# Supplementary material for: Comparison of Vaisala radiosondes RS41 and RS92 in the oceans ranging from the Arctic to tropics
Source: Copernicus journal article supplement (doi:10.5194/amt-2017-45), 2017-03-29
Supplement: Supplementary file [file amt-2017-45-AC1-supplement.pdf]

# Comparison of Vaisala radiosondes RS41 and RS92 ~~in-~~ launched over the oceans ~~ranging~~ from the Arctic to the Ttropics

Yoshimi Kawai<sup>1</sup>, Masaki Katsumata<sup>1</sup>, Kazuhiro Oshima<sup>2</sup>, Masatake E. Hori<sup>2</sup>, and Jun  
Inoue<sup>3</sup>

<sup>1</sup>Research and Development Center for Global Change, Japan Agency for Marine–Earth  
Science and Technology, Yokosuka 237-0061, Japan

<sup>2</sup>Institute of Arctic Climate and Environment Research, Japan Agency for Marine–Earth  
Science and Technology, Yokosuka 237-0061, Japan

<sup>3</sup>Arctic Environment Research Center, National Institute of Polar Research, Tachikawa  
190-8518, Japan

*Correspondence to:* Yoshimi Kawai (ykawai@jamstec.go.jp)

**Abstract.** To assess the differences between the RS92 radiosonde and its improved  
counterpart, the Vaisala RS41-SGP, radiosonde version with ~~radiosonde that has a~~  
pressure sensor, 36 twin-radiosonde launches were made over the Arctic Ocean, Bering  
Sea, northwestern Pacific Ocean, and the tropical Indian Ocean during two cruises of the

22 R/V *Mirai* in 2015. The biases, standard deviations, and root mean squares (RMSs) of the  
23 differences between the RS41 and RS92 data over all flights and altitudes were smaller  
24 than the nominal combined uncertainties of the RS41, except that the RMS of the  
25 differences of pressure above 100 hPa exceeded 0.6 hPa. A comparison between daytime  
26 and nighttime flights in the tropics revealed that the pressure difference was systematically  
27 larger during the day than at night above an altitude of 4.5 km, ~~the suggesting~~ngon being that  
28 there was some effect of solar heating on the pressure measurements, but the exact  
29 reason is unclear. The agreement between the RS41 and RS92 temperature  
30 measurements was better than the combined uncertainties. However, there were some  
31 noteworthy discrepancies ~~that were~~ presumably caused by the “wet-bulbing” effect on the  
32 RS92 radiosonde and the stagnation of the balloon. Although the median of the relative  
33 humidity differences was only a little more than 2 % of the relative humidity at all altitudes,  
34 the relative humidity of the RS92 was much lower than that of the RS41 at altitudes of about  
35 17 km in the tropics. This dry bias might have been caused by the incomplete solar  
36 radiation correction of the RS92, and a correction table for the daytime RS92 humidity was  
37 calculated. This study showed that the RS41 measurements were consistent with the  
38 specifications of the manufacturer in most cases over both the tropical and polar oceans.  
39 However, further studies ~~of~~on the causes of the discrepancies are needed.

40

## 41 1 Introduction

42 Radiosonde observations are operationally ~~regularly~~ conducted twice a day at about 800  
43 sites throughout the world. Radiosondes measure temperature, humidity, wind velocities,  
44 and pressure (or height) in the troposphere and stratosphere. They ascend through the  
45 atmosphere attached to balloons filled with helium or hydrogen gas. The data are sent to  
46 the global telecommunication system and are used for data assimilation in real-time  
47 operational weather forecast systems, atmospheric reanalyses, and climate models. In situ  
48 aerological observations are also indispensable for validating satellite-derived  
49 meteorological data (e.g. Fujita et al., 2008), for assessing long-term trends in the upper  
50 atmosphere (e.g. Thorne et al., 2005; Maturilli and Kayser, 2016), and for other  
51 meteorological research, including assimilation experiments and air-sea interaction studies  
52 (e.g. Inoue et al., 2013; 2015; Kawai et al., 2014). Efforts to improve the quality ~~enhance the~~  
53 ~~reliability~~ of radiosonde data have continued to the present time (e.g. Ciesielski et al., 2014;  
54 Bodeker et al., 2016). One consequence of the technological advancements has been the  
55 need to account for accuracy differences following radiosonde upgrades in the long-term  
56 continuous datasets (Wang et al., 2013).

57 The model RS92 radiosonde manufactured by Vaisala Ltd., which was first introduced  
58 in 2003, has been used throughout the world, and it is now being replaced with a successor  
59 model, the RS41 (Table 1). To clarify the differences between the RS41 and RS92  
60 radiosondes, intercomparison experiments have already been carried out at several sites

61 on land from high latitudes to the tropics (Möhl, 2014; Jauhiainen et al., 2014; Jensen et al.,  
62 2016). Jauhiainen et al. (2014) have reported results of comparisons in several countries,  
63 including Finland, the United Kingdom, the Czech Republic, and Malaysia. They reported  
64 that the RS41 radiosonde was a consistent improvement over the RS92 in terms of  
65 reproducibility with respect to temperature and humidity under both day and night  
66 conditions. A different intercomparison study was carried out at a site in Oklahoma, USA, by  
67 Jensen et al. (2016). They showed that the RS92 and RS41 measurements agreed much  
68 better than the manufacturer-specified combined uncertainties. Their results also indicated  
69 that the RS41 measurements of temperature and humidity appeared to be less sensitive to  
70 solar heating than those made with the RS92.

71 The accuracy of the pressure measured with the model RS41-SGP, however, has not  
72 yet been examined, nor has a comparison been made between the RS41 and RS92  
73 radiosondes in the marine atmosphere. Unlike the atmosphere over land, the marine  
74 atmosphere is less affected by topography and the greater temperature variations of the  
75 land surface. As a result, phenomena such as convection and precipitation and their diurnal  
76 cycles over the oceans are different from those over land (e.g. Yang and Slingo, 2001;  
77 Minobe and Takebayashi, 2015). We performed a total of 36 intercomparison flights during  
78 two cruises of R/V *Mirai* of the Japan Agency for Marine-Earth Science and Technology  
79 (JAMSTEC) in 2015. Our observations covered a wide range of latitudes over the oceans,  
80 an important consideration from the standpoint of confirming the performance of the RS41.

81 We describe the cruises and the methodology of the intercomparison observations in Sect.  
82 2. Section 3 shows the results of the comparisons. In Sect. 4, we focus on the data obtained  
83 in the tropics and further discuss the reasons for the differences between the RS41 and  
84 RS92 results. Section 5 is a summary of the study.

## 85 **2 Intercomparison experiment**

### 86 **2.1 Cruises**

87 The intercomparison observations were performed by launching both the RS41 and RS92  
88 radiosondes tied to one balloon (referred to as a “twin-radiosonde” flight) during the  
89 MR15-03 and MR15-04 cruises of R/V *Mirai*. In the case of the MR15-03 cruise, the vessel  
90 departed from Hachinohe, Japan, on 26 August, cruised the Arctic Ocean from 6  
91 September to 3 October (Nishino et al., 2015), and returned to Hachinohe on 21 October.

92 The twin-radiosonde flights were launched 9 times in the Chukchi Sea, 4 times in the Bering  
93 Sea, and 5 times in the northwestern Pacific (Fig. 1a and Table 2). The MR15-04 cruise  
94 was for tropical meteorological research, and the vessel stayed near 4°04' S, 101°54' E off  
95 Bengkulu, west of Sumatra Island, in the Indian Ocean during 23 November to 17  
96 December for stationary observations, including 16 twin-radiosonde flights (Katsumata et  
97 al., 2015). We also conducted intercomparison observations twice in the western Pacific on  
98 the way from Japan to the site off Sumatra (Fig. 1b and Table 2). ~~(Note that the cruise~~  
99 ~~reports [Katsumata et al., 2015; Nishino et al., 2015] were written based on RS92 data~~

100 ~~wrongly processed with an older version of DigiCORA. The preliminary analyses in the~~  
101 ~~cruise reports should be disregarded.)~~

## 102 **2.2 Methods**

103 We used radiosonde models RS92-SGPD and RS41-SGP in this study. Their nominal  
104 accuracies are summarized in Table 1. Whereas the RS41-SG radiosonde used in the  
105 previous studies (Motl, 2014; Jauhiainen et al., 2014; Jensen et al., 2016) derived pressure  
106 from Global Positioning System (GPS) data with no pressure sensor, the RS41-SGP has a  
107 pressure sensor consisting of a silicon capacitor. The pressure and height data analyzed in  
108 this study were measured directly and derived from the hypsometric equation, respectively.  
109 Note that GPS-derived pressure and height were not used, unlike in the previous studies.  
110 Two different DigiCORA systems were used on R/V *Mirai* for the simultaneous RS92 and  
111 RS41 soundings. The receiving system (MW41) used for the RS41 included a processor  
112 (SPS331), processing and recording software (MW41 v2.2.1), GPS antenna (GA20), and  
113 UHF antenna (RB21), which was part of the ASAP sounding station permanently installed  
114 on R/V *Mirai*. The RS41 sensors were calibrated with a new calibrator (RI41) and a  
115 barometer (PTB330). In contrast, we used a previous generation system for the RS92: the  
116 receiving system (MW31) included a processor (SPS311), software (DigiCORA v3.64),  
117 GPS antenna (GA31), and UHF antenna (RM32). The instrumentation was temporarily  
118 placed in or on the aft wheelhouse. The RS92 sensors were calibrated with a calibrator

119 (GC25) and a PTB330 barometer. Because version 3.61 of DigiCORA was incorrectly used  
120 during the cruises, all RS92 sounding data were simulated with DigiCORA v3.64 after the  
121 cruises.

122 The RS41 and RS92 radiosondes were directly attached to each other with sticky  
123 tape (Fig. 2) instead of hanging them from the two ends of a rod (Jensen et al., 2016) to  
124 facilitate the launching operations on the rocking ship deck. The two radiosondes were  
125 hung from a single 350g Totex balloon with the cord of the RS41 radiosonde. The ascent  
126 rates were approximately  $5 \text{ m s}^{-1}$  and  $4 \text{ m s}^{-1}$  during the MR15-03 and MR15-04 cruises,  
127 respectively (Table 2). Whereas nighttime twin-radiosonde flights could be carried out only  
128 once during the MR15-03 cruise owing to operations associated with oceanographic  
129 observations, we performed eight nighttime flights during the MR15-04 cruise (Fig. 1c and  
130 Table 2). In addition information about surface meteorological state, Table 2 lists convective  
131 available potential energy (CAPE), convective inhibition (CIN), and precipitable water (PW)  
132 calculated from RS41 data. CAPE and CIN were calculated for an air parcel corresponding  
133 to an average over the lowest 50 hPa.

134 A number of issues were addressed in post-processing the sounding data. During  
135 flight No. 33 (02:50 UTC on 16 Dec.), the radiosondes ~~moved up and down around a~~  
136 ~~temperature of  $0^{\circ}\text{C}$ , perhaps because the balloon froze~~ oscillated vertically about the  $0^{\circ}\text{C}$   
137 level likely due to icing on the balloon, and hence only the data before the up-and-down  
138 motion were analyzed in this study. In the case of flight No. 9 (05:30 UTC on 16 Sep.), we

139 delayed the measurement time of the RS41 by 17 s in the analysis because the twin  
140 radiosondes flew horizontally just after launching, and the automatic determinations of the  
141 starting times disagreed between the RS92 and RS41. Because the pressure values  
142 measured with the PTB330 barometer for the calibration of the RS92 had a bias of 0.18  
143 hPa before the launch of the No. 5 radiosondes, we subtracted 0.18 hPa from the observed  
144 pressure values of the RS92 No. 1–4 radiosondes when the data were analyzed. The  
145 balloon release detection mode was changed from automatic to manual during the  
146 MR15-04 cruise, and the starting times of the RS92 and RS41 radiosondes during the  
147 MR15-04 cruise generally appeared to differ slightly. Therefore, the measurement times of  
148 all the RS92 radiosonde data during the MR15-04 cruise were delayed by 1.7 s in the  
149 analysis.

### 150 **3 Results**

151 ~~For easier~~To facilitate comparison with the results of Jensen et al. (2016), we interpolated  
152 the RS92 radiosonde profiles to the same time step as the RS41 profiles, and calculated  
153 differences between them at each 10-m vertical grid based on the RS41 radiosonde heights  
154 (Fig. 3). The vertical axis of Fig. 3 is therefore nearly equivalent to the passage of time. The  
155 biases, standard deviations, and root mean square (RMS) differences were all smaller than  
156 the combined uncertainties, except that the RMS differences of pressure above 100 hPa  
157 exceeded 0.6 hPa (Table 3). For temperature and wind speeds, the biases and RMS



158 differences in our experiments were nearly the same as those of Jensen et al. (2016), but  
159 the differences of pressure and relative humidity were much larger in our study.

### 160 3.1 Pressure

161 The pressure difference between the RS41 and RS92 radiosondes increased as the  
162 radiosondes rose to an altitude of about 5 km but averaged an almost constant 0.5–0.6 hPa  
163 above that altitude (Fig. 3a). The 90th-percentile line revealed that the sensor-measured  
164 RS41 pressure was lower than the RS92 for more than 90 % of the measurements above 5  
165 km. The percentage of the pressure differences that exceeded the combined uncertainty  
166 (Table 1) was 13.7 % below 100 hPa but 50.9 % above 100 hPa. The bias of pressure  
167 causes the bias of geopotential height (Fig.3b). The height difference increased with the  
168 altitude: The median of the RS41 height was greater than that of the RS92 by  
169 approximately 35 m at an altitude of 15 km, and 100 m at 22 km.

170 We also checked the GPS-derived pressure of the RS41 radiosondes. Figure 4  
171 shows the difference between the RS92 pressure and the RS41 GPS-derived one. The use  
172 of the GPS-derived pressure reduced the bias by approximately 0.2 hPa above an altitude  
173 of 15 km, but there was still a bias of 0.4 hPa or more at most of altitudes. The median of  
174 the difference in Fig.4 was almost the same as in Fig.3a around an altitude of 5 km. The  
175 use of the GPS did not essentially improve the pressure bias. This is different from the  
176 results of Jensen et al. (2016).

## 177 3.2 Relative humidity

178 The median of the relative humidity differences peaked at approximately 2 %RH near  
179 10 km (Fig. [3b3c](#)), a result consistent with the data of Jensen et al. (2016). The humidity  
180 difference was also large near the sea surface in our analysis. For 13.0 % of the  
181 measurements, the absolute value of the difference exceeded 4.0 %RH, which is the  
182 combined uncertainty of the RS41-SGP. One noteworthy feature of Fig. [3b-3c](#) is that there  
183 were quite large differences of relative humidity at a height of about 17 km, although the  
184 median difference was less than 0.5 %RH. Figure [4-5](#) shows the relationship between the  
185 humidity difference and temperature for each category of relative humidity. During both the  
186 MR15-03 and MR15-04 cruises, the RS41 radiosonde tended to record a higher mean  
187 relative humidity than the RS92 for all humidity ranges. The humidity difference peaked at  
188 around  $-40^{\circ}\text{C}$ , a pattern similar to Fig. 17 of Jensen et al. (2016). The differences were  
189 relatively small in the range of  $-50^{\circ}$  to  $-70^{\circ}\text{C}$ , but the RS41 humidity was much higher than  
190 the RS92 at temperatures below  $-80^{\circ}\text{C}$  (Fig. [4b5b](#)). The atmosphere associated with  
191 temperatures below  $-80^{\circ}\text{C}$  corresponds to the tropopause in the tropics, where the greatest  
192 differences were apparent at altitudes of about 17 km (Fig. [3b3c](#)).

## 193 3.3 Temperature

194 In the case of temperature, although there was a slight positive bias below an altitude of 10  
195 km, the median of the differences was within  $\pm 0.12^{\circ}\text{C}$  below an altitude of 26 km (Fig. [3c3d](#)).

196 The median exceeded 0.5°C above 27 km, but only four flights reached that height, and the  
197 large median was attributable to differences on two of the flights (No. 23 and 24). The  
198 percentages of the temperature difference that exceeded the combined uncertainty were  
199 4.0 % below 16 km and 5.9 % above 16 km. Figure ~~3e-3d~~ also shows that the standard  
200 deviation of the temperature differences was smaller at altitudes below 16 km, but there  
201 were quite large standard deviations near the surface and at altitudes of about 1.3 km and  
202 5.3 km because of some outliers. The extreme temperature difference, which reached  
203 2.75°C at an altitude of 1.27 km, was observed on 10 December in the tropics (Fig. ~~5a6a~~).  
204 The RS92 temperature became much lower than the RS41 just after the radiosondes  
205 passed through a saturated layer into a dry layer. The greater reduction of the RS92  
206 temperature was probably due to the “wet-bulbing” effect mentioned by Jensen et al. (2016),  
207 who indicated that the sequential pulse heating method with relatively long non-heating  
208 periods may not be sufficient to eliminate icing/wetting of the RS92 sensor. A large  
209 temperature difference that was likely caused by the wet-bulbing effect was also observed  
210 in a sounding in the Arctic, although the maximum difference was less than 0.75°C (Fig.  
211 ~~5b6b~~).

212 Figure ~~6-7~~ shows the cases of extreme temperature differences that contributed to the  
213 greater standard deviation and cannot be explained by the wet-bulbing effect. For the flight  
214 on 11 December (Fig. ~~6a7a~~), there was a large temperature discrepancy inside the  
215 saturated layer. In that case, the radiosondes were launched in heavy rain, and the ascent

216 rate dropped to nearly zero at approximately 5.4 km, probably because of rain or snow and  
217 freezing of the balloon. Furthermore, the horizontal wind speed was less than  $3.0 \text{ m s}^{-1}$   
218 around this altitude. As a result, the temperature sensors were presumably not ventilated  
219 sufficiently. In the case of the flights on 1 and 3 December (Fig. ~~6b~~7b and ~~6e~~7c), the RS41  
220 temperatures were higher than the RS92 by more than  $1.0^{\circ}\text{C}$  near the surface. Because  
221 the surface reference air temperatures were close to the RS92 temperatures at the lowest  
222 level, we suspect that the RS41 temperatures were too high. These large temperature  
223 differences lead to enormous discrepancies in CAPE:  $864.6 \text{ J kg}^{-1}$  for No.22, and  $1819.0 \text{ J}$   
224  $\text{kg}^{-1}$  for No.23. Yoneyama et al. (2002) have indicated that ship body heating can affect  
225 radiosonde sensors. However, that effect was restricted to within several tens of meters of  
226 the sea surface in their experiments. Although we cannot completely exclude the possibility  
227 that the temperature sensors of the two RS41 radiosondes were improperly heated by the  
228 body of the ship or direct insolation or improper handling near the surface, the reason for  
229 these large discrepancies remains unclear.

### 230 **3.4 Wind speed**

231 Vertical profiles of the wind speed differences are shown in Fig. ~~3d~~3e and ~~3e~~3f. The  
232 percentages of the differences in the zonal and meridional wind speeds that exceeded  $0.5$   
233  $\text{m s}^{-1}$  were 1.9 % and 1.5 %, respectively. Although both the zonal and meridional wind  
234 speeds agreed to within  $0.5 \text{ m s}^{-1}$  for almost all measurements, several spikes can be seen

235 in the standard deviations and percentiles. In half of all flights, the magnitude of the  
236 difference of the horizontal wind speed exceeded  $1.0 \text{ m s}^{-1}$  for a brief moment. The wind  
237 speed data in our soundings were noisier than those reported by Jensen et al. (2016).

238

## 239 **4 Discussion**

### 240 **4.1 Day-night differences**

241 Figure [7-8](#) compares the differences between daytime (10 flights) and nighttime (8 flights)  
242 for the soundings during the MR15-04 cruise. The median of the pressure difference was  
243 greater in the day than at night above an altitude of 4.5 km (Fig. [7a8a](#)). The median of the  
244 nighttime differences was close to that of the daytime flights in the Arctic cruise below an  
245 altitude of 15 km, the implication being that the day-night difference might reflect some  
246 effect of solar heating.

247 The median profiles of temperature differences in the day and night were close to  
248 each other, with slightly larger differences in the night at altitudes of 5–15 km (Fig. [7b8b](#)).  
249 The daytime difference became greater above approximately 24 km, a pattern similar to the  
250 results of Jensen et al. (2016). According to them, the difference in the radiation correction  
251 schemes between the RS92 and RS41 may be the dominant cause of these temperature  
252 differences, particularly at high solar elevation angles and low pressures.

253 The median of the relative humidity difference was larger during the day than at night

254 from the surface to an altitude of 20 km and was especially large at an altitude of about 17  
255 km (Fig. [7e8c](#)). The very large difference ( $RS41 > RS92$ ) in relative humidity around the  
256 tropopause shown in Figs. 3c and [4b-5b](#) occurred in the daytime. This pattern is consistent  
257 with the results of Jauhiainen et al. (2014), who indicated that the difference was largely  
258 due to the dissimilar approaches used to compensate for the heating effect of solar  
259 radiation on the humidity sensor. Similar dry biases were reported for the RS92 radiosonde  
260 with the earlier version of DigiCORA (Vömel et al., 2007; Yoneyama et al., 2008), although  
261 the dry bias was generally absent from later observations processed with v3.64 software  
262 (Ciesielski et al., 2014; Yu et al., 2015). Figure [8-9](#) shows the relative difference of relative  
263 humidity in the daytime between the RS92 and RS41 radiosondes. The relative difference  
264 is defined to be the relative humidity difference expressed as a percentage of the RS41  
265 relative humidity. The relative difference was small in the lower troposphere and became  
266 greater as the radiosondes rose higher. Its median peaked at  $-36.9\%$  at an approximate  
267 altitude of 19 km. This pattern of the vertical profile of relative difference is similar to that  
268 between the RS92 radiosonde and a reference instrument shown by Vömel et al. (2007),  
269 but the values in Fig. [8-9](#) are less than half of those in Fig. 6 of Vömel et al. (2007).

270 We evaluated how the differences between the two types of radiosonde affected  
271 CAPE, CIN, and PW (Table 4). CAPE tended to be larger when the RS92 was used in the  
272 nighttime. This was due to slightly higher temperature of RS92 near the surface (Fig.8b).  
273 On the other hand, in the daytime the RS41 CAPE was larger the RS92 and the RS41 CIN

274 was smaller than the RS92. The day-night differences in the CAPE and CIN biases were  
275 caused by the difference in the humidity bias between daytime and nighttime. The  
276 near-surface humidity of the RS41 was larger than that of the RS92 in the daytime (Fig.8c).  
277 The larger pressure bias in daytime (Fig.8a), which means to thicken an atmospheric layer  
278 in the RS41 observation, also may contribute to the daytime bias of CAPE. The daytime  
279 humidity difference between the RS41 and RS92 affected PW, but the bias of PW was less  
280 than 1.0 mm.

## 281 **4.2 Humidity correction**

282 Figures ~~7e~~8c and ~~8-9~~ imply that a small dry bias still remains in the RS92 radiosonde  
283 observations. We attempted to correct the RS92 relative humidity obtained during the  
284 MR15-04 cruise by using the RS41 as a reference instrument. However, this is not based  
285 on an assertion that the RS42 measurements must be true values. There is no independent  
286 evidence to judge which radiosonde was more accurate. The RS41 relative humidity was  
287 larger than the RS92 at an altitude between 3-13 km (Fig.8c), suggesting that the RS41  
288 humidity also have a slight moist bias that is unrelated to the radiation correction scheme.  
289 The correction attempted in this subsection is a proposal to bridge the gap in relative  
290 humidity between the RS41 and RS92 radiosondes.

291 We used the cumulative distribution function (CDF) matching method proposed by  
292 Nuret et al. (2008) and Ciesielski et al. (2009) to make the correction. The details of this

method can be found in Ciesielski et al. (2009). We first created CDFs of relative humidity for the RS92 and RS41 using temperature bins of 20°C between +30° and –90°C (10 to 30°C, –10 to 10°C, –30 to –10°C, –50 to –30°C, –70 to –50°C, and –90 to –70°C) using 5hPa radiosonde data in 5%RH intervals. Figure 9-10 shows the CDFs of the RS92 and RS41 in the temperature range –90 to –70°C as an example. The frequency of lower relative humidity was greater for the RS92 in this temperature range, which includes the tropopause (Fig. 9a10a). We then, for example, paired the RS92 value of 27.50 %RH at the 71.23th percentile with the corresponding RS41 value at this same percentile. The RS41 relative humidity at the 71.23th percentile was 36.43 %RH, and the difference between 36.43 %RH and 27.50 %RH (= +8.93 %RH) was the bias correction for the RS92 value of 27.5 %RH. Figure 9b-10b shows the bias correction over the entire relative humidity range for temperatures of –90 to –70°C.

Table 4-5 shows the daytime bias correction for the entire ranges of temperatures and relative humidityes. The correction was seldom more than 5 %RH when the RS92 temperature exceeded –60°C. The correction was large for RS92 radiosonde values in the range 15–50 %RH and temperatures of –80°C, with a maximum of +8.93 %RH. This pattern is similar to that of the correction table for the RS80 radiosonde in the daytime reported by Ciesielski et al. (2010) (their Fig. 7b), but the values in Table 4-5 are much smaller. We corrected the daytime RS92 relative humidity values obtained during the MR15-04 cruise using Table 45. The correction value for an arbitrary RS92 measurement



313 can be obtained by linear two-dimensional interpolation using Table [4-5](#) and the RS92  
314 temperature and relative humidity. Figure [40-11](#) shows median profiles of the differences  
315 between the RS92 and RS41 radiosondes before and after the correction. Although the  
316 median of the magnitude of the differences still exceeded 2.0 %RH around 120, 150, and  
317 560 hPa, most of the medians were within  $\pm 1.0$  %RH. The mean of the relative humidity  
318 difference of the 5hPa interval data was  $-2.02$  %RH if no correction was made; this  
319 difference was reduced to  $-0.01$  %RH after the correction.

## 320 **5 Conclusions**

321 To examine differences between the RS41 and RS92 radiosondes, a total of 36  
322 twin-radiosonde flights were performed over the Arctic Ocean, Bering Sea, northwestern  
323 Pacific Ocean, and the tropical Indian Ocean during two cruises of R/V *Mirai* in 2015. We  
324 used the model RS41-SGP radiosonde, which has a pressure sensor, unlike previous  
325 studies that used the RS41-SG, which has no pressure sensor.

326 The biases, standard deviations, and RMS of the differences between the RS41 and  
327 RS92 over all flights and heights were smaller than the nominal combined uncertainties of  
328 the RS41, except that the RMS differences of pressure above 100 hPa exceeded 0.6 hPa.  
329 Whereas the biases and the RMS differences of temperature and wind speeds were close  
330 to those reported by Jensen et al. (2016), the differences of pressure and relative humidity  
331 were greater in our experiments. The pressure difference increased as the radiosondes

332 rose higher; the median and mean were 0.5–0.6 hPa at altitudes above 5 km. This pressure  
333 difference corresponded to a geopotential height difference of more than 35 m above an  
334 altitude of 15 km. A comparison between daytime and nighttime flights in the tropics  
335 revealed that the pressure difference was systematically larger in the day than at night at  
336 altitudes above 4.5 km, the suggestion being that there was some effect of solar heating on  
337 the pressure measurements. The exact reason, however, is unclear.

338         The RS41 and RS92 temperature measurements in general agreed better than the  
339 combined uncertainties, but there were some noteworthy exceptions. One possible reason  
340 for the noteworthy discrepancies is the wet-bulbing effect described by Jensen et al. (2016).  
341 In a dry layer just above a saturated layer, the RS92 temperature sensor was cooled too  
342 much by evaporation. The RS41 temperature appeared to be less sensitive to this  
343 wet-bulbing effect. This phenomenon was confirmed in both the tropics and Arctic. During  
344 heavy rain and weak wind conditions, the stagnation of the balloon probably suppressed  
345 the ventilation around the temperature sensors, the result being an extreme temperature  
346 difference.

347         The median of the relative humidity differences at all altitudes was only a little more  
348 than 2 %RH. However, there were quite large differences at an altitude of about 17 km.  
349 These large differences occurred in the daytime around the tropical tropopause, where the  
350 temperature was below  $-80^{\circ}\text{C}$ . The reason for this dry bias may be that there was some  
351 remnant of the error of the RS92 radiosonde solar radiation correction. The differences in

352 humidity affected the calculation of CAPE, CIN, and PW, and we confirmed the day-night  
353 difference of these variables. We attempted to correct the RS92 relative humidity data  
354 obtained in the daytime during the MR15-04 cruise by using the CDF matching method,  
355 and the corrected RS92 relative humidity agreed well with the RS41 values.

356 Our results showed that measurements with the RS41 radiosonde satisfied the  
357 performance specifications of the manufacturer in most cases over both the tropical and  
358 polar oceans. The RS41 temperature and humidity sensors appeared to be unaffected by  
359 the solar radiation correction error and the wet-bulbing effect. Some concerns, however,  
360 remain. Specifically, the reasons for the pressure bias in the upper layer and the two cases  
361 of extreme temperature discrepancies that occurred below an altitude of several hundred  
362 meters are unknown. Further experiments will be necessary to address these issues, and  
363 users should be cognizant of these concerns.

## 364 **6 Data availability**

365 The sounding dataset and the ship-observed surface meteorology are expected to be  
366 released just two years after the cruises (October 2017 for the MR15-03, and December  
367 2017 for the MR15-04) from the website of the Data Research System for Whole Cruise  
368 Information (DARWIN) in JAMSTEC (<http://www.godac.jamstec.go.jp/darwin/e>) in accord  
369 with the cruise data policy of JAMSTEC.

370

371 **Author contributions**

372 All co-authors contributed to designing the experiments and preparing for the observation  
373 cruises. Y. Kawai, M. Katsumata, and K. Oshima participated in the R/V *Mirai* cruises and  
374 carried out the radiosonde soundings. K. Oshima reprocessed the RS92 data. Y. Kawai  
375 mainly analyzed the data and prepared the manuscript with contributions from all  
376 co-authors.

377

378 *Acknowledgments.* The authors sincerely thank the captains, crews, and observation  
379 technicians of the R/V *Mirai* and all colleagues who helped with the experiments. The  
380 authors are also grateful to K. Yoneyama of JAMSTEC for valuable advice, especially for  
381 advice concerning the humidity correction. This study was supported by the Japan Society  
382 for the Promotion of Science (JSPS) Grants-in-Aid for Scientific Research (A), (B), and (C)  
383 (KAKENHI) Grant Number 24241009, 16H04046, and 16K05563.

384

385 **References**

386 Bodeker, G. E., Bojinski, S., Cimini, C., Dirksen, R. J., Haeffelin, M., Hannigan, J. W., Hurst,  
387 D. F., Leblanc, T., Madonna, F., Maturilli, M., Mikalsen, A. C., Philpona, R., Reale, T.,  
388 Siedel, D. J., Tan, D. G. H., Thorne, P. W., Vömel, H., and Wang, J.: Reference upper-air  
389 observations for climate: From concept to reality, B. Am. Meteorol. Soc., 97, 123-135,

doi:10.1175/BAMS-D-14-00072.1, 2016.

Ciesielski, P. E., Johnson, R. H., and Wang, J: Correction of humidity biases in Vaisala RS80-H sondes during NAME, J. Atmos. Ocean. Tech., 26, 1763-1780, doi:10.1175/2009JTECHA1222.1, 2009.

Ciesielski, P. E., Chang, W.-M., Huang, S. -C., Johnson, R. H., Jou, B. J. -D., Lee, W. -C., Lin, P. -H., Liu, C. -H., and Wang, J.: Quality-controlled upper-air sounding dataset for TiMREX/SoWMEX: Development and corrections, J. Atmos. Ocean. Tech., 27, 1802-1821, doi:10.1175/2010JTECHA1481.1, 2010.

Ciesielski, P. E., Yu, H., Johnson, R. H., Yoneyama, K., Katsumata, M., Long, C. N., Wang, J., Loehrer, S. M., Young, K., Williams, S. F., Brown, W., Braun, J., and Van Hove, T.: Quality-controlled upper-air sounding dataset for DYNAMO/CINDY/AMIE: Development and corrections, J. Atmos. Ocean. Tech., 31, 741-764, doi:10.1175/JTECH-D-13-00165.1, 2014.

Fujita, M., Kimura, F., Yoneyama, K., and Yoshizaki, M.: Verification of precipitable water vapor estimated from shipborne GPS measurements, Geophys. Res. Lett., 35, L13803, doi:10.1029/2008GL033764, 2008

Inoue, J., Enomoto, T., and Hori, M. E.: The impact of radiosonde data over the ice-free Arctic Ocean on the atmospheric circulation in the Northern Hemisphere, Geophys. Res. Lett., 40, 864-869, doi:10.1002/grl.50207, 2013.

Inoue, J., Yamazaki, A., Ono, J., Dethloff, K., Maturilli, M., Neuber, R., Edwards, P., and

410 Yamaguchi, H.: Additional Arctic observations improve weather and sea-ice forecasts for  
 411 the Northern Sea Route, *Sci. Rep.*, 5, 16868, doi:10.1038/srep16868, 2015.

412 Jauhiainen, H., Survo, P., Lehtinen, R., and Lentonen, J.: Radiosonde RS41 and RS92 key  
 413 differences and comparison test results in different locations and climates. *TECO-2014*,  
 414 WMO Technical Conference on Meteorological and Environmental Instruments and  
 415 Methods of Observations, Saint Petersburg, Russian Federation, 7–9 July 2014, P3(16),  
 416 2014.

417 Jensen, P. M., Holdridge, D. J., Survo, P., Lehtinen, R., Baxter, S., Toto, T., and Johnson, K.  
 418 L.: Comparison of Vaisala radiosondes RS41 and RS92 at the ARM Southern Great  
 419 Plains site, *Atmos. Meas. Tech.*, 9, 3115-3129, doi:10.5194/amt-9-3115-2016, 2016.

420 Katsumata, M., and coauthors: R/V Mirai Cruise Report MR15-04, Cruise Rep., Japan  
 421 Agency for Marine-Earth Science and Technology, Yokosuka, Japan, 241.pp, 2015.  
 422 (Available from  
 423 [http://www.godac.jamstec.go.jp/catalog/data/doc\\_catalog/media/MR15-04\\_all.pdf](http://www.godac.jamstec.go.jp/catalog/data/doc_catalog/media/MR15-04_all.pdf))

424 Kawai, Y., Tomita, H., Cronin, M. F., and Bond, N. A.: Atmospheric pressure response to  
 425 mesoscale sea surface temperature variations in the Kuroshio Extension: In situ  
 426 evidence, *J. Geophys. Res. Atmos.*, 119, 8015-8031. doi:10.1002/2013JD021126, 2014.

427 Maturilli, M., and Kayser, M.: Arctic warming, moisture increase and circulation changes  
 428 observed in the Ny-Ålesund homogenized radiosonde record, *Theor. Appl. Climatol.*,  
 429 doi:10.1007/s00704-016-1864-0, 2016.

430 Minobe, S., and Takebayashi, S.: Diurnal precipitation and high cloud frequency variability  
 431 over the Gulf Stream and over the Kuroshio, *Clim. Dyn.*, 44, 2079-2095,  
 432 doi:10.1007/s00382-014-2245-y, 2015.

433 Motl, M.: Vaisala RS41 trial in the Czech Republic, *Vaisala News*, 192, 14-17, 2014.

434 Nishino, S., and coauthors: R/V Mirai Cruise Report MR15-03, Cruise Rep., Japan Agency  
 435 for Marine-Earth Science and Technology, Yokosuka, Japan, 297.pp, 2015. (Available  
 436 from  
 437 [http://www.godac.jamstec.go.jp/catalog/data/doc\\_catalog/media/MR15-03\\_leg1\\_all.pdf](http://www.godac.jamstec.go.jp/catalog/data/doc_catalog/media/MR15-03_leg1_all.pdf))

438 Nuret, M., Lafore, J.-P., Bock, O., Guichard, F., Agusti-Panareda, A., N'Gamini, J.-B., and  
 439 Redelsperger, J.-L.: Correction of humidity bias for Vaisala RS80-A sondes during the  
 440 AMMA 2006 observing period, *J. Atmos. Ocean. Tech.*, 25, 2152-2158,  
 441 doi:10.1175/2008JTECHA1103.1, 2008.

442 Thorne, P. W., Parker, D. E., Tett, S. F. B., Jones, P. D., McCarthy, M., Coleman, H., and  
 443 Brohan, P.: Revisiting radiosonde upper air temperatures from 1958 to 2002, *J. Geophys.*  
 444 *Res.*, 110, D18105, doi:10.1029/2004JD005753, 2005.

445 Vömel, H., Selkirk, H., Miloshevich, L., Valverde-Canossa, J., Valdés, J., Kyrö, E., Kivi, R.,  
 446 Stolz, W., Peng, G., and Diaz, J. A.: Radiation dry bias of the Vaisala RS92 humidity  
 447 sensor, *J. Atmos. Ocean. Tech.*, 24, 953-963, doi:10.1175/JTECH2019.1, 2007.

448 Wang, J., Zhang, L., Dai, A., Immler, F., Sommer, M., and Vömel, H.: Radiation dry bias  
 449 correction of Vaisala RS92 humidity data and its impacts on historical radiosonde data, *J.*

Atmos. Ocean. Tech., 30, 197-214, doi:10.1175/JTECH-D-12-00113.1, 2013.

Yang, G.-Y., and Slingo, J.: The diurnal cycle in the tropics, Mon. Wea. Rev., 129, 784-801, doi:10.1175/1520-0493(2001)129<0784:TDCITT>2.0.CO;2, 2001.

Yoneyama, K., Hanyu, M., Sueyoshi, S., Yoshiura, F., and Katsumata, M.: Radiosonde observation from the ship in the tropical region, Report of Japan Marine Science and Technology Center, 45, 31-39, 2002. (Available from [http://www.jamstec.go.jp/res/ress/yoneyamak/PDFs/Yoneyama-etal\\_2002\\_JAMSTECR.pdf](http://www.jamstec.go.jp/res/ress/yoneyamak/PDFs/Yoneyama-etal_2002_JAMSTECR.pdf))

Yoneyama, K., Fujita, M., Sato, N., Fujiwara, M., Inai, Y., and Hasebe, F.: Correction for radiation dry bias found in RS92 radiosonde data during the MISMO field experiment, SOLA, 4, 13-16, doi:10.2151/sola.2008-004, 2008.

Yu, H., Ciesielski, P. E., Wang, J., Kuo, H.-C., Vömel, H., and Dirksen, R.: Evaluation of humidity correction methods for Vaisala RS92 tropical sounding data, J. Atmos. Ocean. Tech., 32, 397–411, doi:10.1175/JTECH-D-14-00166.1, 2015.



466 **Table 1.** Nominal accuracies of the radiosondes according to the manufacturer.

467

|                                                                                                         |                                | RS41-SGP                             | RS92-SGPD                                             |
|---------------------------------------------------------------------------------------------------------|--------------------------------|--------------------------------------|-------------------------------------------------------|
| Weight                                                                                                  |                                | 113 g                                | 280 g                                                 |
| Combined uncertainty<br>in sounding (2-sigma<br>confidence level<br>(95.5 %) cumulative<br>uncertainty) | Temperature                    | 0.3°C < 16 km<br>0.4°C > 16 km       | 0.5°C                                                 |
|                                                                                                         | Relative humidity              | 4 %RH                                | 5 %RH                                                 |
|                                                                                                         | Pressure                       |                                      | 1.0 > 100 hPa<br>0.6 < 100 hPa                        |
|                                                                                                         | Temperature <sup>a</sup>       | 0.15°C > 100 hPa<br>0.30°C < 100 hPa | 0.2°C > 100 hPa<br>0.3°C 100–20 hPa<br>0.5°C < 20 hPa |
|                                                                                                         | Relative humidity <sup>a</sup> |                                      | 2 %RH                                                 |
| Reproducibility in<br>sounding (standard<br>deviation of<br>differences in twin<br>soundings)           | Pressure                       |                                      | 0.5 > 100 hPa<br>0.3 < 100 hPa                        |
|                                                                                                         | Wind speed                     |                                      | 0.15 m/s                                              |
|                                                                                                         | Wind direction <sup>b</sup>    |                                      | 2°                                                    |

468 <sup>a</sup> Ascent rate above 3 m s<sup>-1</sup>

469 <sup>b</sup> Wind speed above 3 m s<sup>-1</sup>

**Table 2.** Date, position (latitude and longitude), ~~and~~ surface meteorological state (pressure, temperature, relative humidity, wind direction, and wind speed), CAPE, CIN, and PW when each twin-radiosonde was launched. Line under UTC time denotes nighttime.

| <u>Cruise</u> | No. | Date                | Time<br>(UTC) | <u>Time</u><br><u>(LT)</u> | Lat. (°N)           | Lon. (°E)             | Pressure<br>(hPa) | Temp.<br>(°C) | RH<br>(%) | Wind<br>dire.<br>(°) | Wind<br>speed<br>(m s <sup>-1</sup> ) | <u>RS41</u><br>Maximum<br>height (m) | Mean ascent<br>rate (m s <sup>-1</sup> ) | <u>RS41</u><br><u>CAPE</u><br>(J kg <sup>-1</sup> ) | <u>RS41 CIN</u><br>(J kg <sup>-1</sup> ) | <u>RS41 PW</u><br>(mm) |
|---------------|-----|---------------------|---------------|----------------------------|---------------------|-----------------------|-------------------|---------------|-----------|----------------------|---------------------------------------|--------------------------------------|------------------------------------------|-----------------------------------------------------|------------------------------------------|------------------------|
| <u>15-03</u>  | 1   | 27 Aug.             | 23:30         | <u>9:30</u>                | 40.17 <del>0</del>  | 149.94 <del>4</del>   | 1011.7            | 15.9          | 69        | 23                   | 7.1                                   | 26,734                               | 4.06                                     | <u>0</u>                                            | <u>NA</u>                                | <u>14.3</u>            |
|               | 2   | 28 Aug.             | 23:30         | <u>9:30</u>                | 42.42 <del>3</del>  | 153.41 <del>3</del>   | 1010.7            | 14.0          | 70        | 306                  | 11.2                                  | 23,328                               | 4.42                                     | <u>0.6</u>                                          | <u>1.5</u>                               | <u>11.3</u>            |
|               | 3   | 29 Aug.             | 23:30         | <u>9:30</u>                | 44.83 <del>4</del>  | 157.19 <del>3</del>   | 1004.2            | 12.1          | 93        | 289                  | 11.6                                  | 21,607                               | 4.45                                     | <u>0</u>                                            | <u>NA</u>                                | <u>31.2</u>            |
|               | 4   | 31 Aug.             | 23:32         | <u>10:32</u>               | 49.93 <del>4</del>  | 165.75 <del>3</del>   | 999.6             | 10.9          | 93        | 275                  | 5.6                                   | 19,380                               | 4.74                                     | <u>3.8</u>                                          | <u>4.5</u>                               | <u>24.0</u>            |
|               | 5   | 2 Sep.              | 23:30         | <u>11:30</u>               | 55.49 <del>3</del>  | 175.34 <del>2</del>   | 1000.4            | 10.3          | 97        | 155                  | 7.8                                   | 13,617                               | 4.68                                     | <u>3.7</u>                                          | <u>0</u>                                 | <u>22.9</u>            |
|               | 6   | 4 Sep.              | 23:32         | <u>11:32</u>               | 63.43 <del>29</del> | -172.92 <del>17</del> | 1008.6            | 9.0           | 81        | 294                  | 3.6                                   | 23,554                               | 5.06                                     | <u>0.2</u>                                          | <u>0.7</u>                               | <u>19.9</u>            |
|               | 7   | <del>7-8</del> Sep. | 5:30          | <u>18:30</u>               | 71.05 <del>4</del>  | -166.94 <del>37</del> | 1015.9            | 1.3           | 83        | 342                  | 6.7                                   | 22,872                               | 5.22                                     | <u>2.6</u>                                          | <u>0.4</u>                               | <u>8.4</u>             |
|               | 8   | 12 Sep.             | 23:30         | <u>13:30</u>               | 72.48 <del>76</del> | -156.29 <del>89</del> | 1009.8            | -0.1          | 96        | 91                   | 9.3                                   | 21,243                               | 5.36                                     | <u>0.1</u>                                          | <u>0</u>                                 | <u>12.8</u>            |
|               | 9   | 16 Sep.             | 5:30          | <u>19:30</u>               | 72.34 <del>4</del>  | -156.18 <del>3</del>  | 1015.1            | -1.7          | 86        | 46                   | 5.4                                   | 22,298                               | 5.33                                     | <u>0</u>                                            | <u>0.2</u>                               | <u>7.7</u>             |
|               | 10  | 24 Sep.             | 23:31         | <u>12:31</u>               | 73.21 <del>09</del> | -157.80 <del>4</del>  | 993.2             | 0.7           | 95        | 170                  | 9.8                                   | 25,309                               | 5.12                                     | <u>0</u>                                            | <u>0</u>                                 | <u>13.1</u>            |
|               | 11  | 28 Sep.             | 17:31         | <u>6:31</u>                | 74.37 <del>69</del> | -166.57 <del>69</del> | 987.8             | -1.4          | 92        | 164                  | 8.6                                   | 23,291                               | 5.18                                     | <u>9.4</u>                                          | <u>0.3</u>                               | <u>6.8</u>             |
|               | 12  | 28 Sep.             | 23:30         | <u>12:30</u>               | 74.47 <del>66</del> | -168.18 <del>4</del>  | 982.0             | -0.9          | 70        | 167                  | 11.2                                  | 22,811                               | 5.26                                     | <u>0</u>                                            | <u>NA</u>                                | <u>6.4</u>             |
|               | 13  | 29 Sep.             | 5:30          | <u>18:30</u>               | 74.00 <del>2</del>  | -168.76 <del>55</del> | 979.9             | -2.3          | 80        | 210                  | 9.9                                   | 19,338                               | 5.25                                     | <u>47.8</u>                                         | <u>1.1</u>                               | <u>4.6</u>             |
|               | 14  | 30 Sep.             | <u>11:30</u>  | <u>0:30</u>                | 70.38 <del>79</del> | -168.76 <del>55</del> | 993.2             | -2.1          | 89        | 282                  | 7.0                                   | 19,897                               | 5.16                                     | <u>0</u>                                            | <u>NA</u>                                | <u>5.1</u>             |
|               | 15  | 30 Sep.             | 23:30         | <u>12:30</u>               | 68.06 <del>4</del>  | -168.83 <del>29</del> | 1008.6            | 1.8           | 69        | 296                  | 7.1                                   | 22,613                               | 5.17                                     | <u>25.2</u>                                         | <u>1.0</u>                               | <u>5.3</u>             |
|               | 16  | 4 Oct.              | 23:30         | <u>12:30</u>               | 60.74 <del>2</del>  | -167.78 <del>77</del> | 1011.4            | 8.1           | 100       | 186                  | 14.3                                  | 19,498                               | 4.77                                     | <u>0.3</u>                                          | <u>0</u>                                 | <u>20.6</u>            |
|               | 17  | 11 Oct.             | 23:30         | <u>11:30</u>               | 53.64 <del>39</del> | 178.82 <del>4</del>   | 1006.8            | 6.3           | 90        | 10                   | 3.8                                   | 25,051                               | 5.17                                     | <u>0.7</u>                                          | <u>0.4</u>                               | <u>14.5</u>            |

|              |    |         |              |              |         |           |        |      |    |     |      |        |      |               |             |             |
|--------------|----|---------|--------------|--------------|---------|-----------|--------|------|----|-----|------|--------|------|---------------|-------------|-------------|
|              | 18 | 17 Oct. | 23:30        | <u>9:30</u>  | 41.790  | 154.884   | 1019.8 | 12.0 | 64 | 177 | 2.9  | 25,928 | 5.21 | <u>0</u>      | <u>NA</u>   | <u>9.2</u>  |
| <u>15-04</u> | 19 | 10 Nov. | 5:38         | <u>14:38</u> | 23.5765 | 136.764   | 1011.6 | 26.7 | 83 | 357 | 3.3  | 25,395 | 3.78 | <u>1309.0</u> | <u>5.6</u>  | <u>42.1</u> |
|              | 20 | 11 Nov. | 5:39         | <u>14:39</u> | 19.210  | 134.814   | 1011.6 | 28.0 | 81 | 72  | 8.1  | 26,589 | 4.04 | <u>1558.5</u> | <u>4.6</u>  | <u>42.6</u> |
|              | 21 | 30 Nov. | 8:29         | <u>15:29</u> | -4.0876 | 101.8985  | 1006.2 | 28.5 | 75 | 202 | 4.2  | 22,184 | 3.95 | <u>630.9</u>  | <u>22.8</u> | <u>59.8</u> |
|              | 22 | 1 Dec.  | 5:30         | <u>12:30</u> | -4.054  | 101.8987  | 1008.1 | 28.4 | 79 | 298 | 2.7  | 26,510 | 4.27 | <u>2228.8</u> | <u>3.4</u>  | <u>60.4</u> |
|              | 23 | 3 Dec.  | 5:29         | <u>12:29</u> | -4.0767 | 101.893   | 1008.5 | 28.0 | 82 | 275 | 4.2  | 28,867 | 4.35 | <u>3008.1</u> | <u>3.7</u>  | <u>63.0</u> |
|              | 24 | 5 Dec.  | 2:30         | <u>9:30</u>  | -4.0769 | 101.883   | 1009.5 | 26.0 | 92 | 254 | 1.9  | 28,016 | 4.07 | <u>645.1</u>  | <u>15.9</u> | <u>64.6</u> |
|              | 25 | 5 Dec.  | <u>17:45</u> | <u>0:45</u>  | -4.0985 | 101.893   | 1008.6 | 27.4 | 86 | 80  | 1.3  | 26,822 | 3.98 | <u>1531.4</u> | <u>1.0</u>  | <u>64.7</u> |
|              | 26 | 6 Dec.  | <u>20:26</u> | <u>3:26</u>  | -4.0767 | 101.910   | 1005.8 | 27.9 | 85 | 139 | 6.2  | 27,518 | 3.97 | <u>1393.3</u> | <u>23.0</u> | <u>63.9</u> |
|              | 27 | 8 Dec.  | <u>14:29</u> | <u>21:29</u> | -4.0879 | 101.890   | 1010.5 | 27.9 | 82 | 126 | 3.0  | 26,965 | 4.26 | <u>1357.2</u> | <u>0.8</u>  | <u>63.4</u> |
|              | 28 | 9 Dec.  | 2:28         | <u>9:28</u>  | -4.053  | 101.8987  | 1010.0 | 27.4 | 81 | 298 | 1.9  | 27,123 | 4.32 | <u>979.2</u>  | <u>9.6</u>  | <u>66.8</u> |
|              | 29 | 10 Dec. | <u>17:27</u> | <u>0:27</u>  | -4.042  | 101.890   | 1009.1 | 27.0 | 87 | 6   | 1.4  | 24,650 | 4.40 | <u>1324.6</u> | <u>0.3</u>  | <u>63.3</u> |
|              | 30 | 11 Dec. | <u>14:20</u> | <u>21:20</u> | -4.053  | 101.873   | 1008.0 | 25.5 | 98 | 5   | 10.3 | 15,050 | 6.62 | <u>162.5</u>  | <u>86.9</u> | <u>78.4</u> |
|              | 31 | 13 Dec. | <u>20:28</u> | <u>3:28</u>  | -4.0659 | 101.894   | 1006.1 | 28.1 | 77 | 324 | 6.2  | 20,798 | 3.57 | <u>887.1</u>  | <u>12.5</u> | <u>60.0</u> |
|              | 32 | 15 Dec. | 5:28         | <u>12:28</u> | -4.0545 | 101.90896 | 1007.9 | 27.6 | 82 | 339 | 8.6  | 23,698 | 4.25 | <u>1229.5</u> | <u>1.5</u>  | <u>61.5</u> |
|              | 33 | 16 Dec. | 2:50         | <u>9:50</u>  | -4.0657 | 101.8986  | 1010.3 | 25.0 | 94 | 310 | 5.2  | 4,803  | 2.48 | <u>0</u>      | <u>0.1</u>  | <u>54.3</u> |
|              | 34 | 16 Dec. | <u>14:22</u> | <u>21:22</u> | -4.062  | 101.8989  | 1010.1 | 26.2 | 90 | 11  | 7.9  | 21,629 | 4.48 | <u>1030.4</u> | <u>0.4</u>  | <u>57.6</u> |
|              | 35 | 17 Dec. | 5:28         | <u>12:28</u> | -4.053  | 101.90896 | 1008.2 | 28.2 | 72 | 278 | 1.4  | 21,607 | 3.61 | <u>379.5</u>  | <u>24.1</u> | <u>48.2</u> |
|              | 36 | 17 Dec. | <u>20:27</u> | <u>3:27</u>  | -5.173  | 101.413   | 1007.2 | 28.2 | 79 | 303 | 6.0  | 24,944 | 3.70 | <u>2035.6</u> | <u>2.7</u>  | <u>59.8</u> |

473 **Table 3.** Biases, RMS differences<sub>s</sub>, and standard deviations (SD<sub>s</sub>) of the variables between  
474 the RS92 and RS41 radiosondes. The bias is the mean of RS92  $\bar{\phantom{x}}$  RS41 differences.  
475

| Variable                                      | Total   |      | MR15-03<br>(Subarctic – Arctic) |      | MR15-04<br>(Subtropics – Tropics) |      |
|-----------------------------------------------|---------|------|---------------------------------|------|-----------------------------------|------|
|                                               | Bias    | RMS  | Bias                            | RMS  | Bias                              | RMS  |
|                                               |         | SD   |                                 | SD   |                                   | SD   |
| Temperature (°C)                              | +0.04   | 0.17 | +0.01                           | 0.15 | +0.06                             | 0.19 |
| P <sub>RS92</sub> > 100hPa                    |         | 0.17 |                                 | 0.15 |                                   | 0.18 |
| Temperature (°C)                              | −0.01   | 0.22 | −0.10                           | 0.27 | +0.05                             | 0.18 |
| P <sub>RS92</sub> < 100hPa                    |         | 0.22 |                                 | 0.25 |                                   | 0.17 |
| Pressure (hPa)                                | +0.52   | 0.67 | +0.41                           | 0.58 | +0.64                             | 0.76 |
| P <sub>RS92</sub> > 100hPa                    |         | 0.42 |                                 | 0.40 |                                   | 0.41 |
| Pressure (hPa)                                | +0.55   | 0.67 | +0.57                           | 0.61 | +0.53                             | 0.71 |
| P <sub>RS92</sub> < 100hPa                    |         | 0.38 |                                 | 0.21 |                                   | 0.47 |
| Relative humidity<br>(%RH)                    | −0.89   | 3.14 | −0.50                           | 2.14 | −1.26                             | 3.86 |
|                                               |         | 3.01 |                                 | 2.08 |                                   | 3.64 |
| Zonal wind speed<br>(m s <sup>−1</sup> )      | −0.0017 | 0.18 | +0.0027                         | 0.17 | −0.0059                           | 0.18 |
|                                               |         | 0.18 |                                 | 0.17 |                                   | 0.18 |
| Meridional wind<br>speed (m s <sup>−1</sup> ) | −0.0051 | 0.17 | +0.0104                         | 0.18 | −0.0199                           | 0.16 |
|                                               |         | 0.17 |                                 | 0.18 |                                   | 0.15 |

476  
477

Table 4. Biases and standard deviations of CAPE, CIN and PW between the RS92 and RS41 radiosondes. The bias is the mean of RS92 – RS41 differences. Values in parentheses are the statistics without the two outliers shown in Fig. 7b-c (Flight No. 22 and No. 23).

|                            | <u>MR15-03</u> |             |            | <u>MR15-04</u> |                |                | <u>MR15-04</u>   |              |             |
|----------------------------|----------------|-------------|------------|----------------|----------------|----------------|------------------|--------------|-------------|
|                            |                |             |            | <u>Daytime</u> |                |                | <u>Nighttime</u> |              |             |
|                            | <u>RS41</u>    | <u>Bias</u> | <u>SD</u>  | <u>RS41</u>    | <u>Bias</u>    | <u>SD</u>      | <u>RS41</u>      | <u>Bias</u>  | <u>SD</u>   |
|                            | <u>Mean</u>    |             |            | <u>Mean</u>    |                |                | <u>Mean</u>      |              |             |
| <u>CAPE</u>                | <u>5.3</u>     | <u>−0.9</u> | <u>1.8</u> | <u>1196.9</u>  | <u>−331.7</u>  | <u>614.7</u>   | <u>1215.3</u>    | <u>111.1</u> | <u>94.8</u> |
| <u>(J kg<sup>−1</sup>)</u> |                |             |            | <u>(841.5)</u> | <u>(−75.4)</u> | <u>(222.4)</u> |                  |              |             |
| <u>CIN</u>                 | <u>0.8</u>     | <u>0.8</u>  | <u>1.9</u> | <u>9.2</u>     | <u>1.1</u>     | <u>4.4</u>     | <u>16.0</u>      | <u>−0.2</u>  | <u>1.3</u>  |
| <u>(J kg<sup>−1</sup>)</u> |                |             |            | <u>(10.6)</u>  | <u>(1.0)</u>   | <u>(5.0)</u>   |                  |              |             |
| <u>PW</u>                  | <u>13.2</u>    | <u>−0.2</u> | <u>0.3</u> | <u>56.3</u>    | <u>−0.9</u>    | <u>1.1</u>     | <u>63.9</u>      | <u>0.1</u>   | <u>0.5</u>  |
| <u>(mm)</u>                |                |             |            | <u>(55.0)</u>  | <u>(−0.6)</u>  | <u>(1.0)</u>   |                  |              |             |

485

486

487

488

**Table 45.** Bias correction table of relative humidity that was created by matching the CDFs from the RS92 data to the RS41 data (%RH) based on the daytime data obtained during the MR15-04 cruise.

|         | $\leq -80^{\circ}\text{C}$ | $-60^{\circ}\text{C}$ | $-40^{\circ}\text{C}$ | $-20^{\circ}\text{C}$ | $0^{\circ}\text{C}$ | $\geq 20^{\circ}\text{C}$ |
|---------|----------------------------|-----------------------|-----------------------|-----------------------|---------------------|---------------------------|
| 2.5 %RH | 1.84                       | 0                     | -0.42                 | 0                     | 0                   | 0                         |
| 7.5     | 0.50                       | 2.35                  | 0.50                  | 0.25                  | 0.36                | 0                         |
| 12.5    | 4.12                       | 2.14                  | 3.24                  | 1.15                  | 0.79                | 0                         |
| 17.5    | 6.47                       | 3.13                  | 2.31                  | 1.43                  | 1.00                | 0                         |
| 22.5    | 7.14                       | 3.33                  | 2.86                  | 1.67                  | 1.67                | 0                         |
| 27.5    | 8.93                       | 1.67                  | 4.09                  | 2.50                  | 1.82                | 0                         |
| 32.5    | 8.13                       | 2.50                  | 4.23                  | 3.00                  | 0.88                | 0                         |
| 37.5    | 7.31                       | 2.50                  | 4.33                  | 2.92                  | 4.17                | 1.67                      |
| 42.5    | 6.25                       | 4.06                  | 4.38                  | 2.73                  | 3.75                | 0.63                      |
| 47.5    | 7.50                       | 5.00                  | 2.50                  | 2.78                  | 2.08                | 4.17                      |
| 52.5    | 5.00                       | 5.50                  | 4.17                  | 2.65                  | 1.67                | 2.14                      |
| 57.5    | 0                          | 4.50                  | 5.00                  | 4.09                  | 2.00                | 1.25                      |
| 62.5    | 0                          | 5.00                  | 2.22                  | 5.00                  | 2.76                | 2.50                      |
| 67.5    | 0                          | 5.00                  | 0                     | 4.44                  | 0.80                | 0.49                      |
| 72.5    | 0                          | 0                     | 0                     | 3.27                  | 1.60                | 1.25                      |
| 77.5    | 0                          | 0                     | 0                     | 3.38                  | 1.35                | 1.44                      |
| 82.5    | 0                          | 0                     | 0                     | 2.50                  | 1.45                | 1.36                      |
| 87.5    | 0                          | 0                     | 0                     | 3.00                  | 1.73                | 0.91                      |
| 92.5    | 0                          | 0                     | 0                     | 2.50                  | 0.90                | 0.56                      |
| 97.5    | 0                          | 0                     | 0                     | 0                     | 0                   | 0                         |

489

490

## Figure Captions

**Figure 1.** Positions of the twin-radiosonde launches during the (a) MR15-03 cruise, and (b) MR15-04 cruise. (c) Time-latitude diagram of the launches. Black and red dots represent daytime and nighttime soundings, respectively.

**Figure 2.** Photographs of (upper) the RS92 and RS41 radiosondes directly attached to each other and (lower) a launch on R/V *Mirai*.

**Figure 3.** Vertical profiles of the median (black), 25–75th percentile (green), 10–90th percentile (gray), and mean  $\pm$  standard deviation (cyan) of all differences between the RS92 and RS41 observations (RS92 – RS41) for (a) pressure, (b) geopotential height, (c) relative humidity, (d) temperature, ~~(e) relative humidity~~, ~~(f) zonal wind~~, and ~~(g) meridional wind~~.

**Figure 4.** As in Fig.3a, but for between the RS41 GPS-derived and RS92 pressures (RS92 – RS41).

**Figure 45.** Mean difference in relative humidity between the RS92 and RS41 radiosondes (RS92 – RS41) as a function of the RS41 temperature for relative humidity ranges of 0–20 % (blue), 20–40 % (red), 40–60 % (green), 60–100 % (black), and 0–100 % (gray).

511

512 **Figure 56.** Vertical profiles of the RS41 temperature (red), RS92 temperature (blue), RS41  
513 relative humidity (magenta), and RS92 relative humidity (cyan). (a) Flight No. 29  
514 launched at 1727 UTC on 10 December 2015 in the tropics, and (b) Flight No. 9 launched  
515 at 0530 UTC on 16 September 2015 in the Arctic.

516

517 **Figure 67.** ~~Same as~~ Fig. 56, but for (a) Flight No. 30 launched at 1420 UTC on 11  
518 December 2015, (b) Flight No. 22 launched at 0530 UTC on 1 December 2015, and (c)  
519 Flight No. 23 launched at 0529 UTC on 3 December 2015. All launches in the tropics.

520

521 **Figure 78.** Differences between the RS92 and RS41 radiosonde (RS92 – RS41) results for  
522 daytime (blue) and nighttime (red) flights during the MR15-04 cruise for (a) pressure, (b)  
523 temperature, and (c) relative humidity.

524

525 **Figure 89.** Relative difference between the RS92 and RS41 relative humidity obtained  
526 during the daytime on the MR15-04 cruise (blue dots, %). Relative difference is defined  
527 as the relative humidity difference expressed as a percentage of the RS41 relative  
528 humidity. Green line denotes the median of the relative difference. Lower panel shows an  
529 enlargement of part of the upper panel.

530



531 **Figure 910.** (a) CDFs of relative humidity for the RS92 (bold dashed line) and RS41 (bold  
532 solid line) data in the temperature range of  $-90$  to  $-70^{\circ}\text{C}$ . The daytime data obtained  
533 during the MR15-04 cruise were used. Thin solid lines illustrate the CDF-matching  
534 technique (see text). (b) Bias correction of relative humidity for the same temperature  
535 range.

536  
537 **Figure 4011.** Medians of the relative humidity difference between the RS92 and RS41  
538 radiosondes obtained during the daytime on the MR15-04 cruise. Blue and black lines  
539 show the profiles before and after the bias correction of the RS92 data.

540

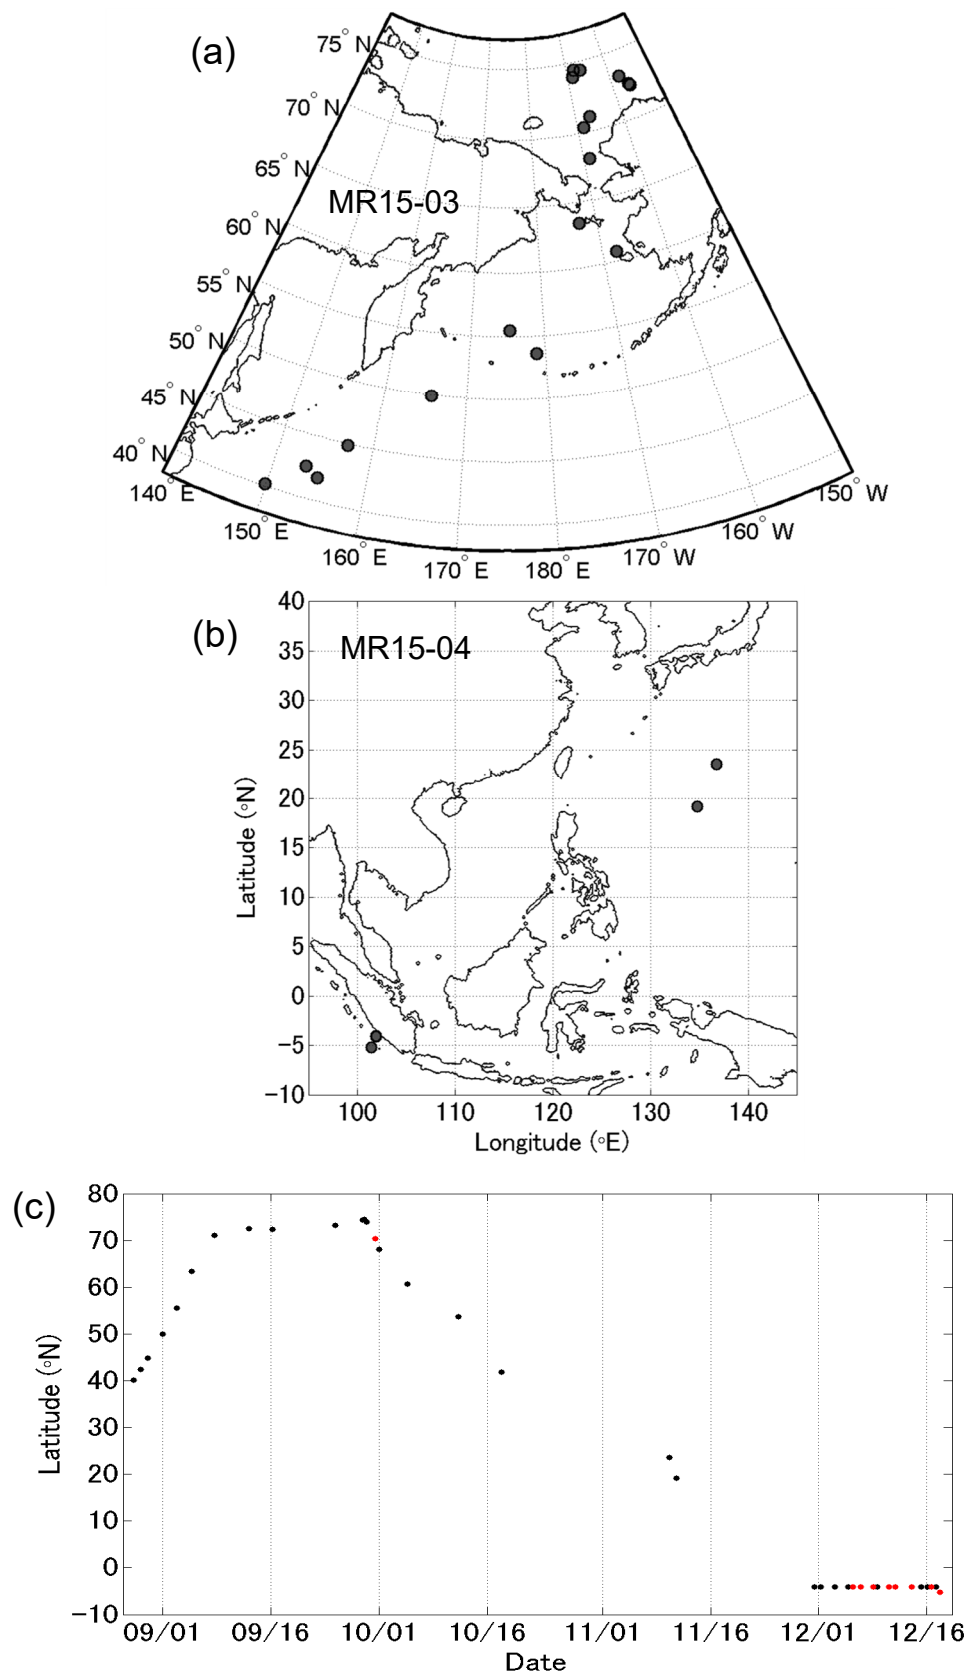

Fig. 1. Positions of the twin-radiosonde launches during the (a) MR15-03 cruise, and (b) MR15-04 cruise. (c) Time-latitude diagram of the launches. Black and red dots represent daytime and nighttime soundings, respectively.

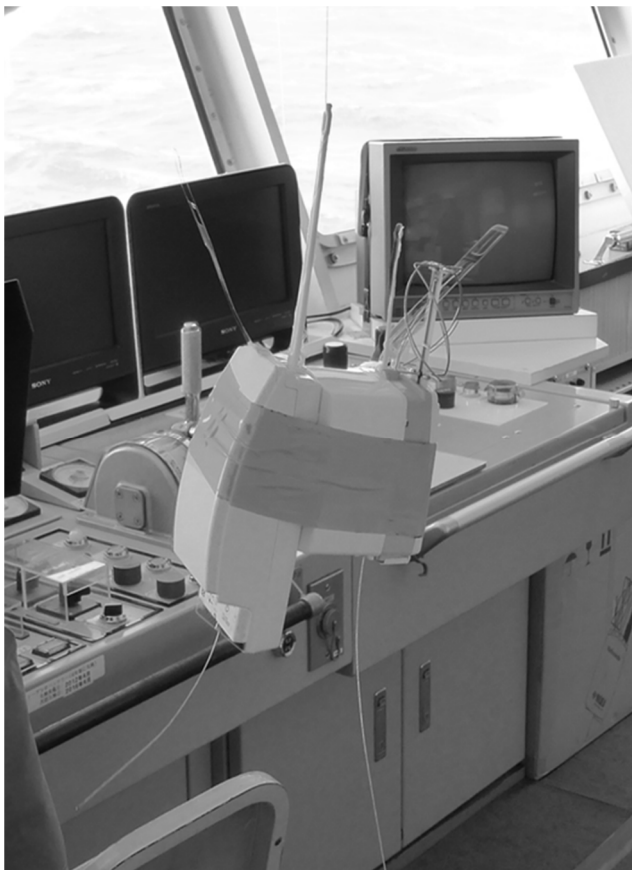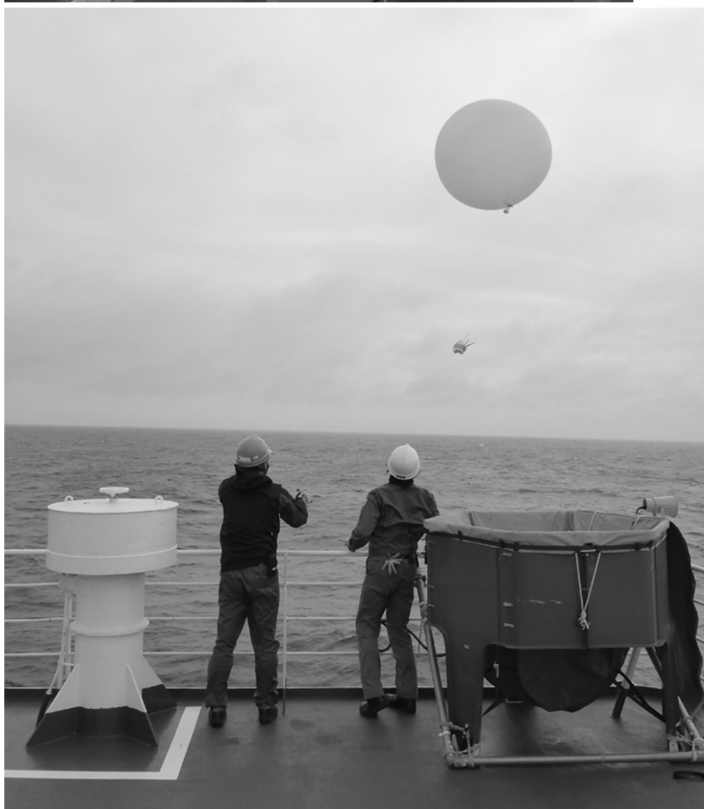

Fig.2. Photographs of (upper) the RS92 and RS41 radiosondes directly attached to each other and (lower) a launch on R/V *Mirai*.

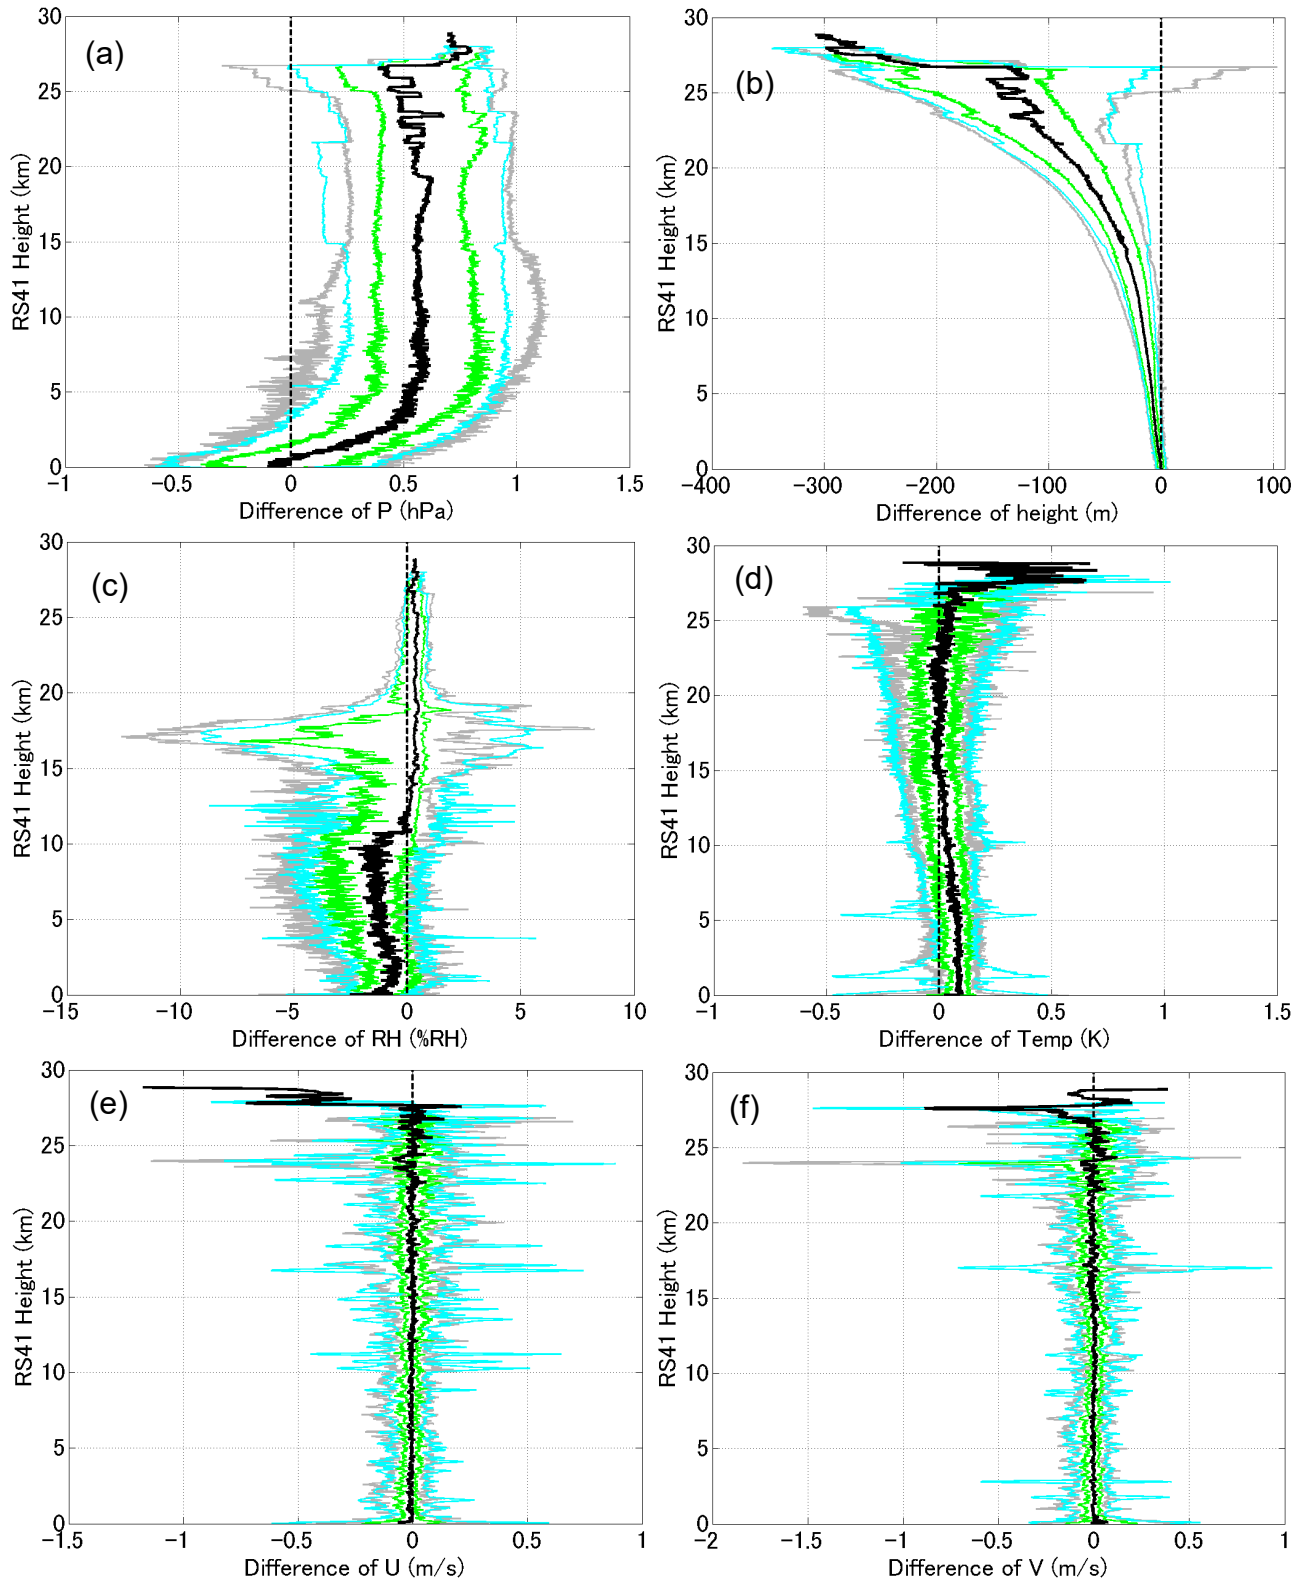

Fig.3. Vertical profiles of the median (black), 25–75th percentile (green), 10–90th percentile (gray), and mean  $\pm$  standard deviation (cyan) of all differences between the RS92 and RS41 observations (RS92 – RS41) for (a) pressure, (b) geopotential height, (c) temperature, (d) relative humidity, (e) zonal wind, and (f) meridional wind.

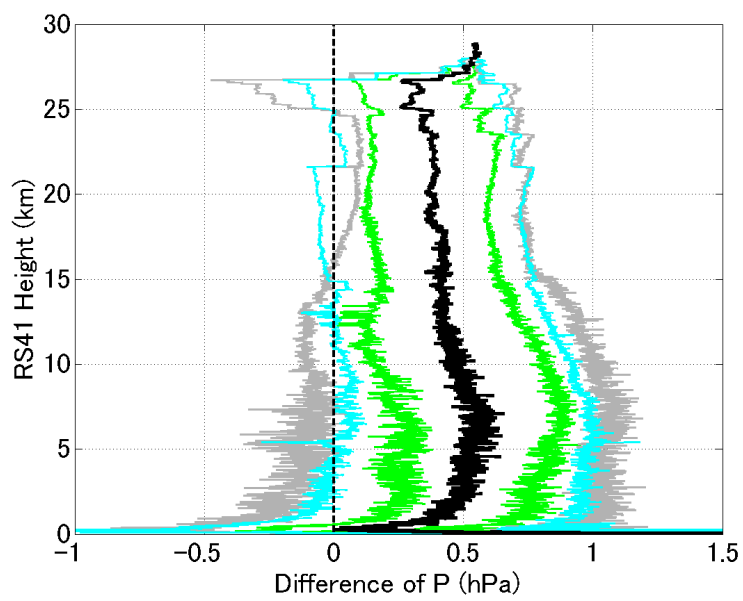

Fig.4. As in Fig.3a, but for between the RS41 GPS-derived and RS92 pressures (RS92 – RS41).

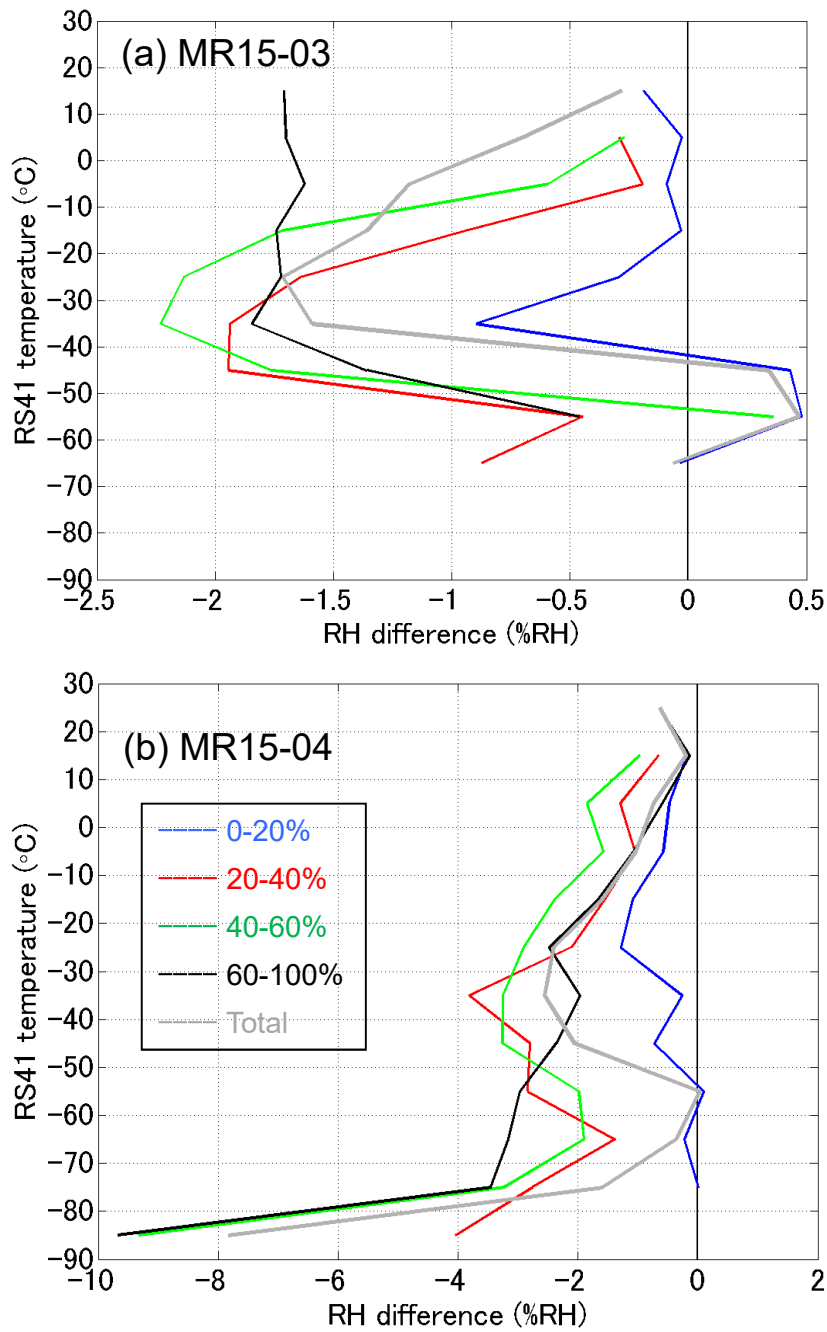

Fig.45. Mean difference in relative humidity between the RS92 and RS41 radiosondes (RS92 – RS41) as a function of the RS41 temperature for relative humidity ranges of 0–20 % (blue), 20–40 % (red), 40–60 % (green), 60–100 % (black), and 0–100 % (gray).

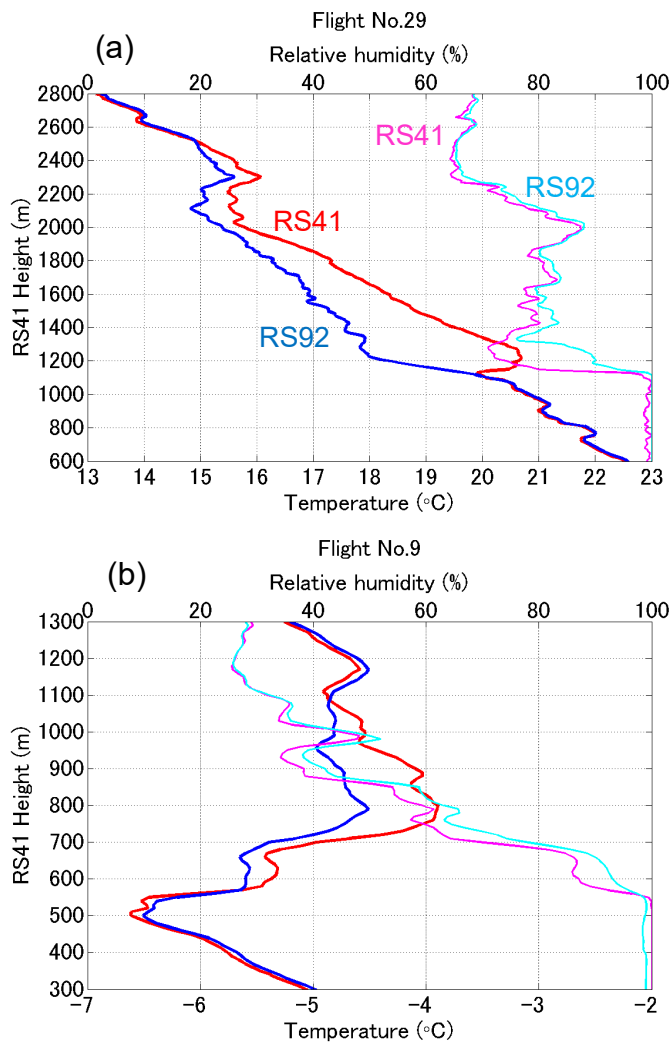

Fig.56. Vertical profiles of the RS41 temperature (red), RS92 temperature (blue), RS41 relative humidity (magenta), and RS92 relative humidity (cyan). (a) Flight No. 29 launched at 1727 UTC on 10 December 2015 in the tropics, and (b) Flight No. 9 launched at 0530 UTC on 16 September 2015 in the Arctic.

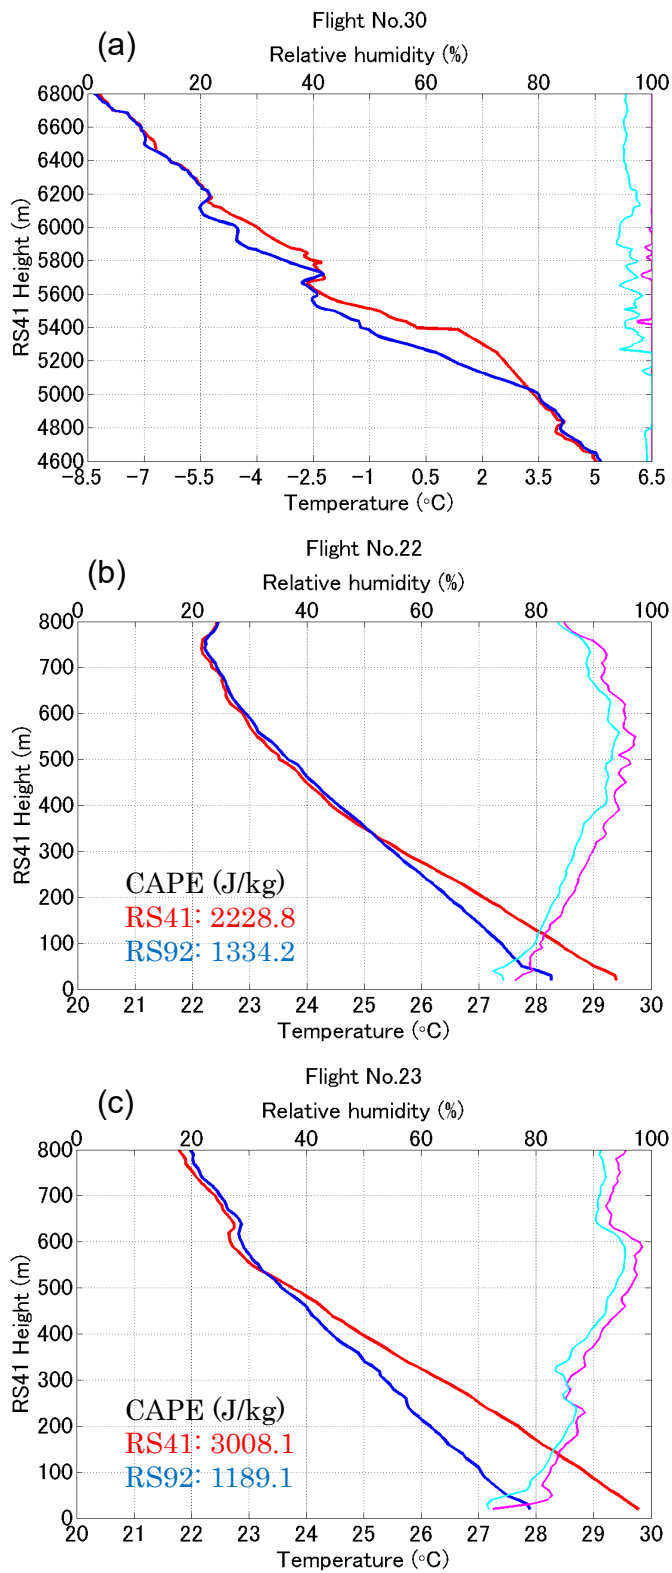

Fig. 67. Same as in Fig. 56, but for (a) Flight No. 30 launched at 1420 UTC on 11 December 2015, (b) Flight No. 22 launched at 0530 UTC on 1 December 2015, and (c) Flight No. 23 launched at 0529 UTC on 3 December 2015. All launches in the tropics.



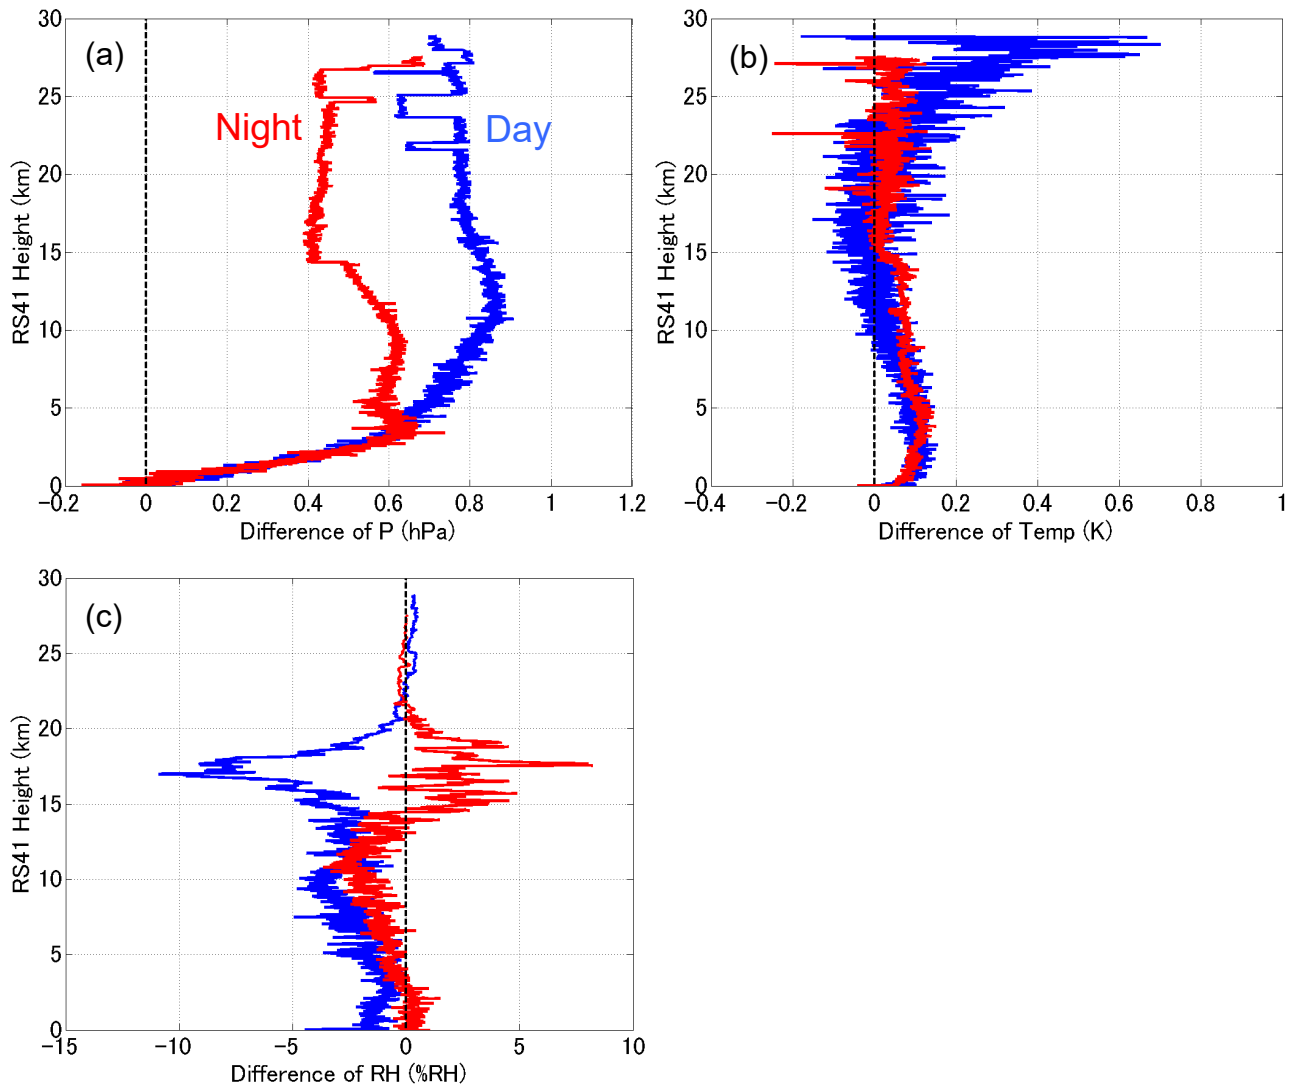

Fig. 78. Differences between the RS92 and RS41 radiosonde (RS92 – RS41) results for daytime (blue) and nighttime (red) flights during the MR15-04 cruise for (a) pressure, (b) temperature, and (c) relative humidity.

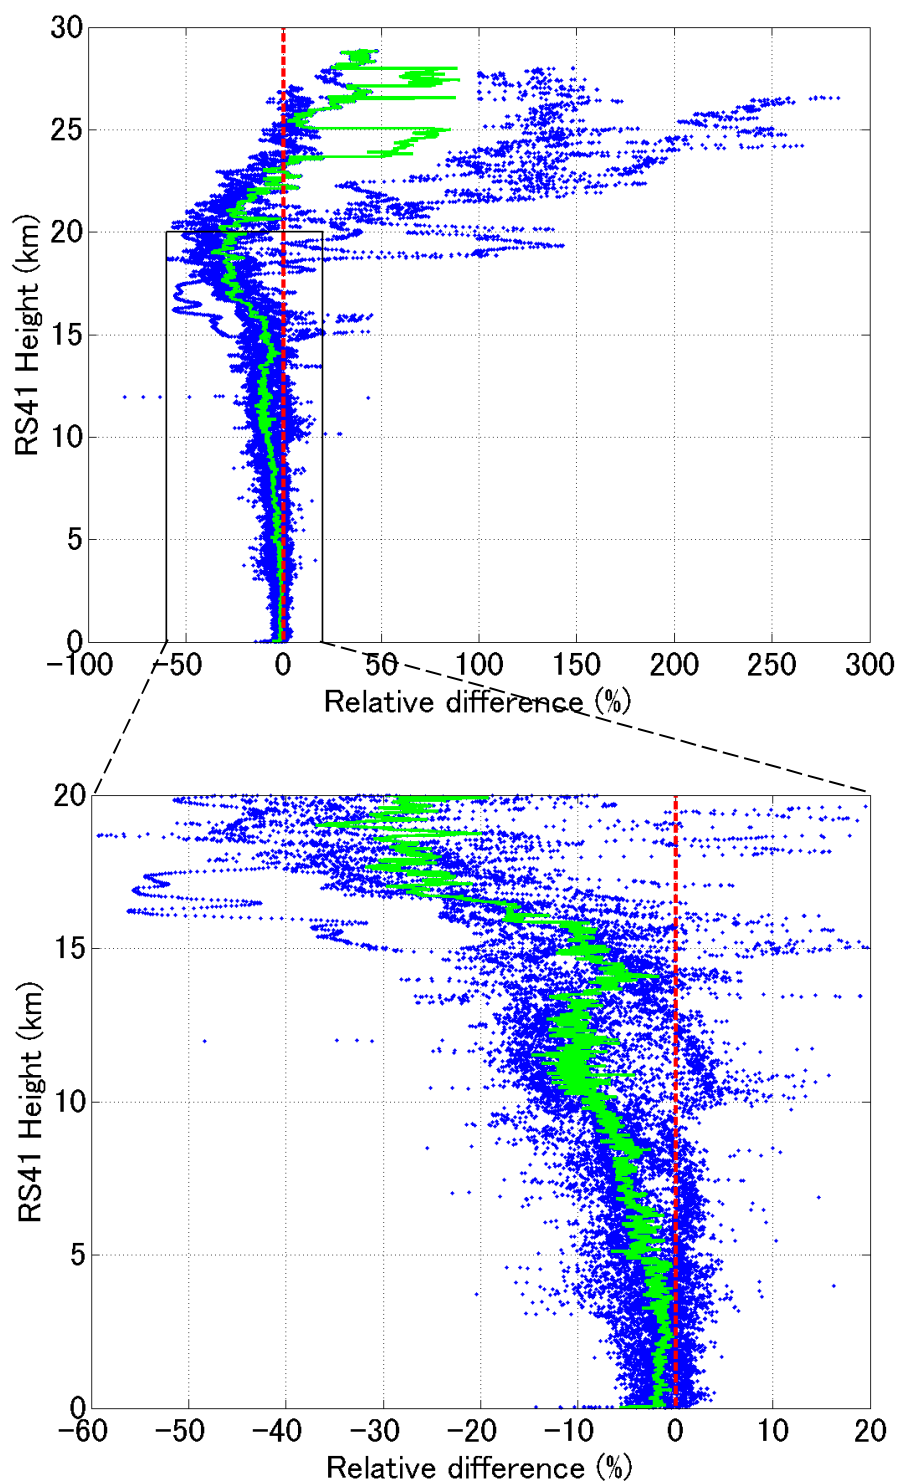

Fig. 89. Relative difference between the RS92 and RS41 relative humidity obtained during the daytime on the MR15-04 cruise (blue dots, %). Relative difference is defined as the relative humidity difference expressed as a percentage of the RS41 relative humidity. Green line denotes the median of the relative difference. Lower panel shows an enlargement of part of the upper panel.

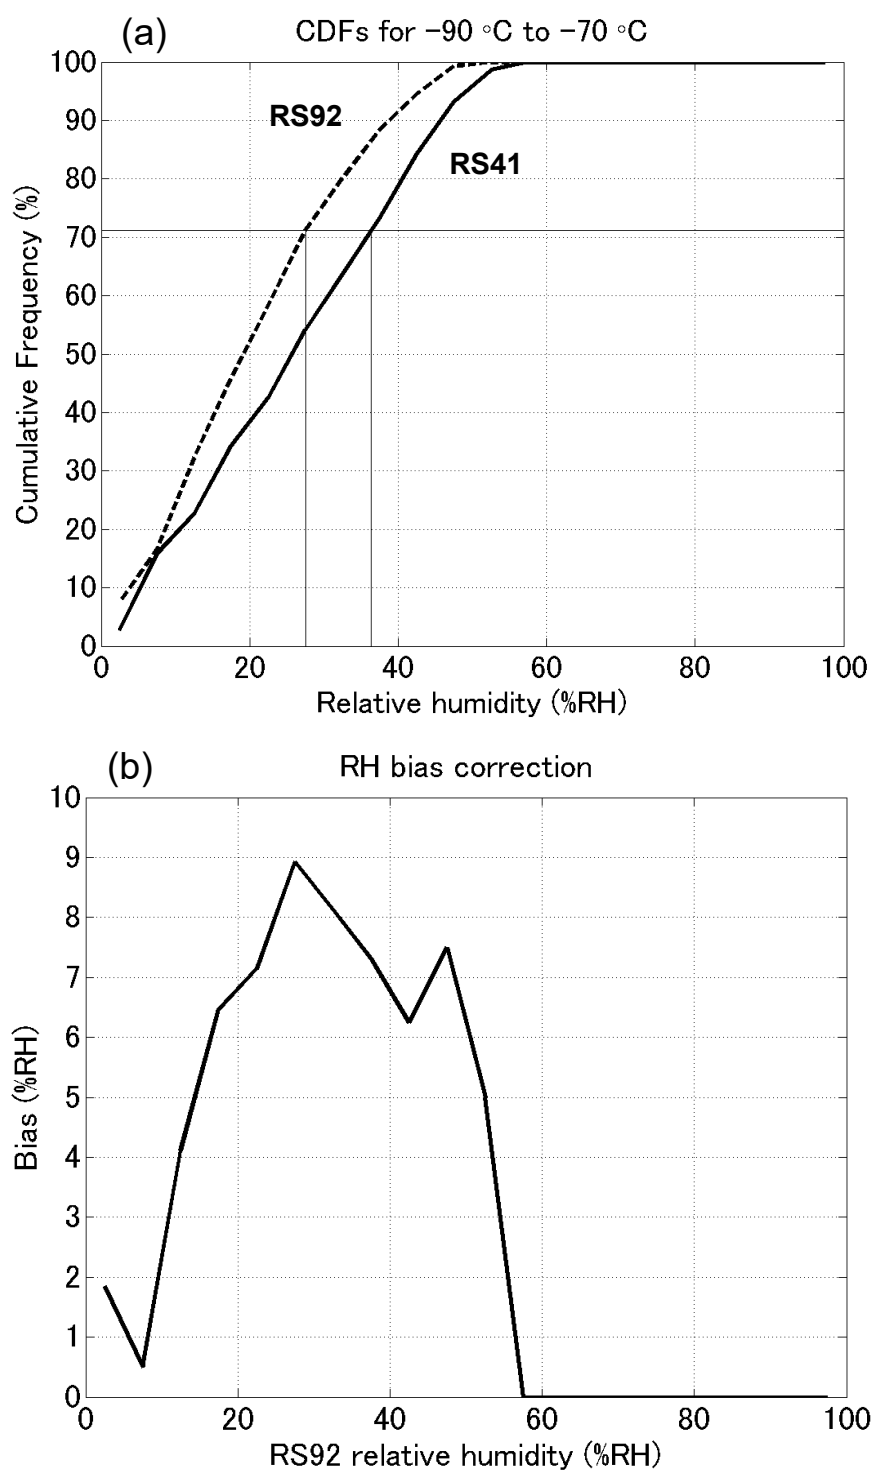

Fig. 910. (a) CDFs of relative humidity for the RS92 (bold dashed line) and RS41 (bold solid line) data in the temperature range of  $-90$  to  $-70^{\circ}\text{C}$ . The daytime data obtained during the MR15-04 cruise were used. Thin solid lines illustrate the CDF-matching technique (see text). (b) Bias correction of relative humidity for the same temperature range.

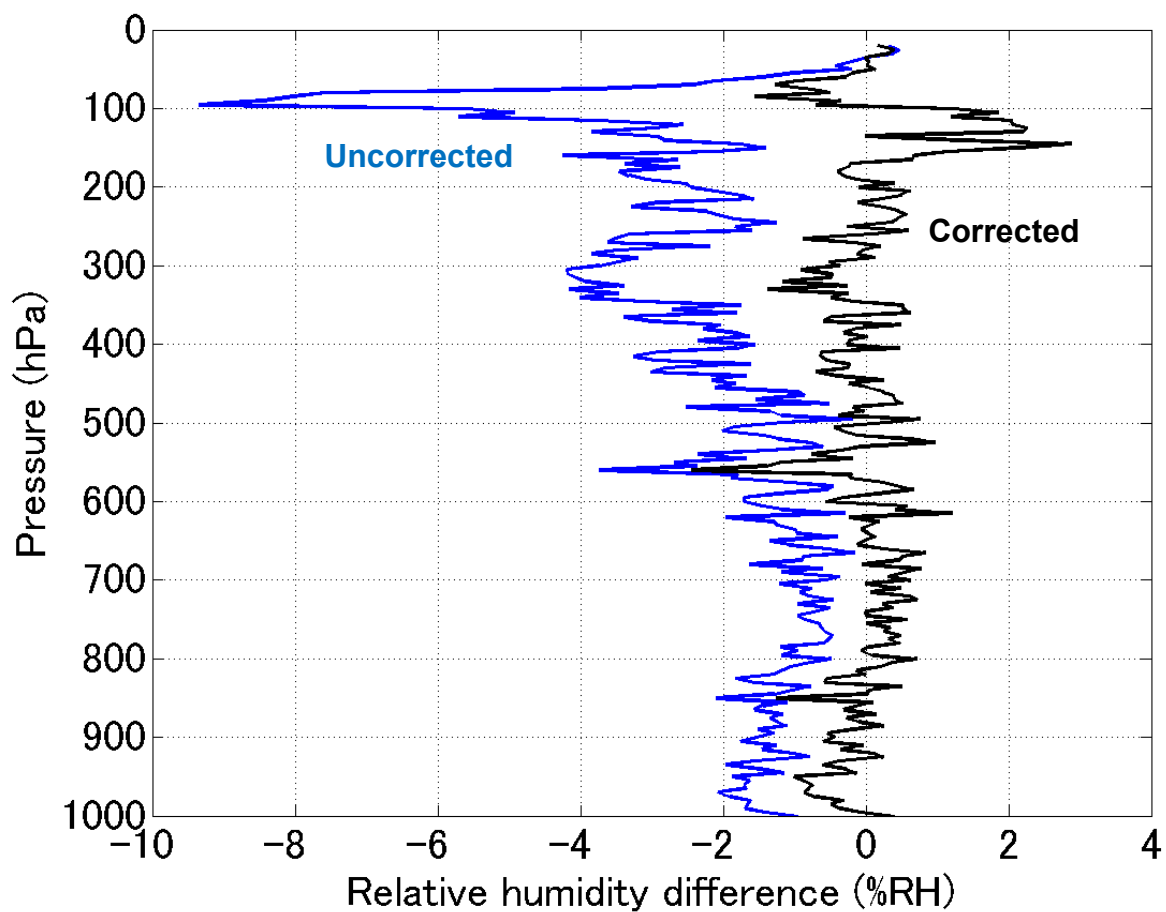

Fig. 4011. Medians of the relative humidity difference between the RS92 and RS41 radiosondes obtained during the daytime on the MR15-04 cruise. Blue and black lines show the profiles before and after the bias correction of the RS92 data.
